# Supplementary material for: Determination of Swelling Behavior and Mechanical and Thermal Resistance of Acrylamide–Acrylic Acid Copolymers under High Pressures and Temperatures
Source: PubMed Central journal article supplement — ACS Omega. 2021 Sep 8;6(37):23862–72. doi: 10.1021/acsomega.1c02638 (PMC8459374; doi:10.1021/acsomega.1c02638), 2021-09-08
Supplement: ao1c02638_si_001.pdf [file ao1c02638_si_001.pdf]

**Determination of Swelling Behavior and Mechanical and Thermal Resistance of  
Acrylamide - Acrylic Acid Copolymers under high pressures and temperatures**

Samira Heidari<sup>a\*</sup> Masoumeh Mohammadi<sup>b</sup>, Feridun Esmailzadeh<sup>a</sup> , Dariush Mowla<sup>a</sup>.

<sup>a</sup> *Enhanced Oil and Gas Recovery Institute, School of Chemical and Petroleum Engineering, Enhanced Gas Condensate Recovery Research Group, Shiraz University, Shiraz, Iran*

<sup>b</sup> *Environmental Research Center in Petroleum and Petrochemical Industries, School of Chemical and Petroleum Engineering, Shiraz University, Shiraz, Iran.*

---

\* Corresponding author: Department of Chemical Engineering, School of Chemical and Petroleum Engineering, Shiraz University, Shiraz, Iran.

Tel.: 0098-711-6133710; Fax: 0098-711-6474616.

E-mail address: samira.heidari.b@gmail.com

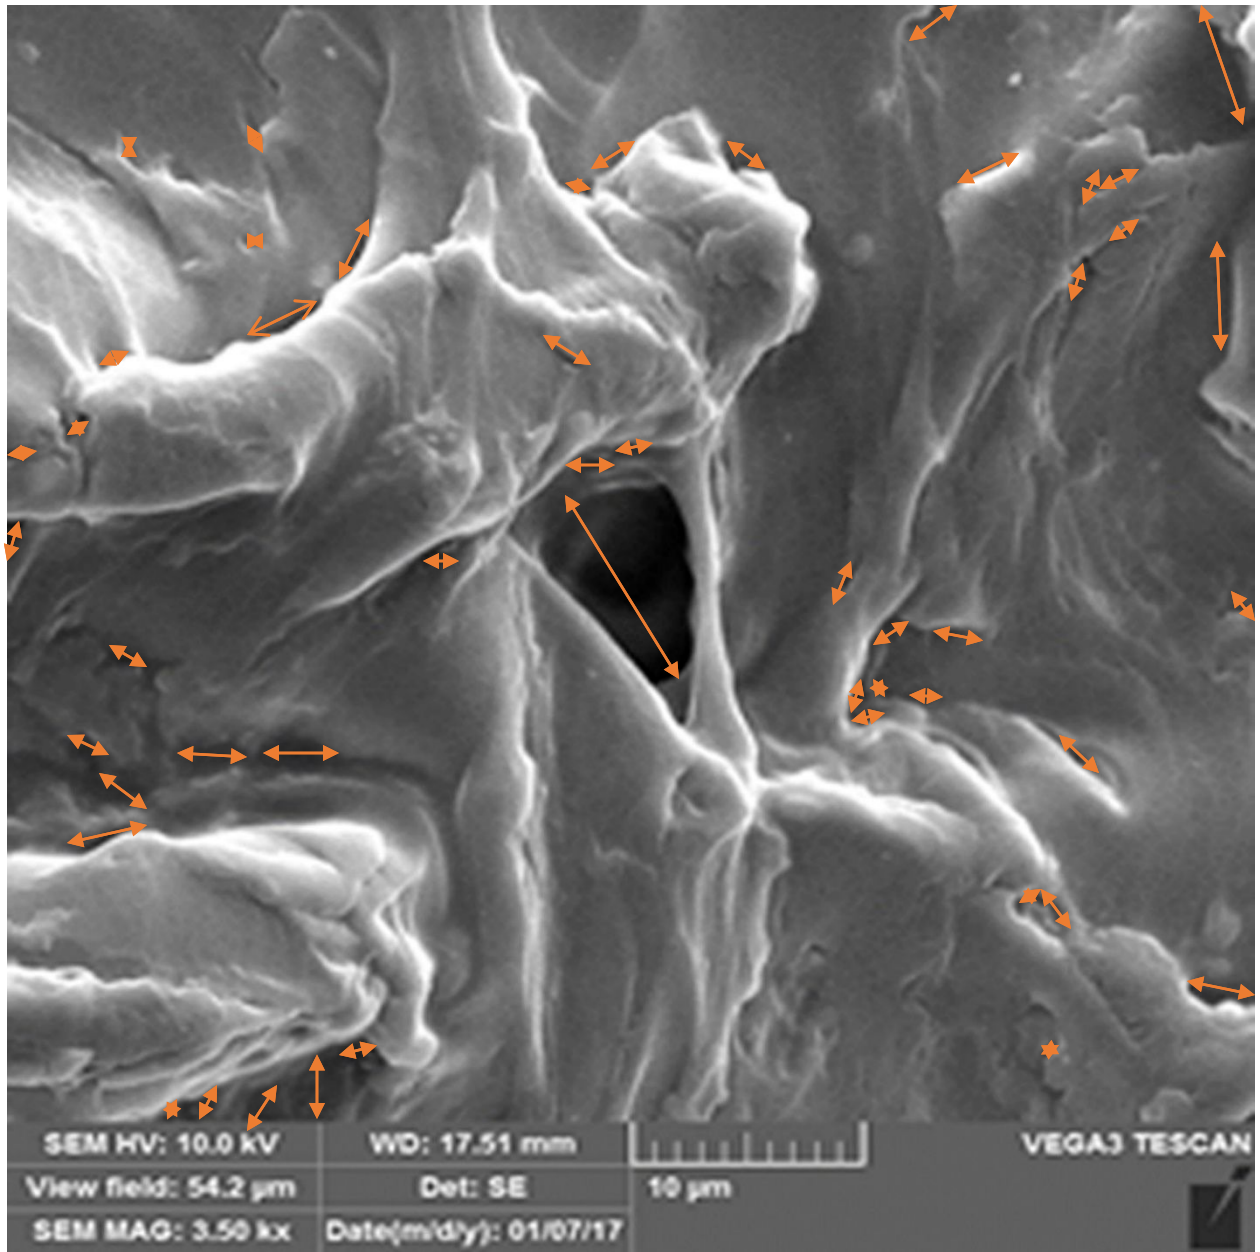

(a)

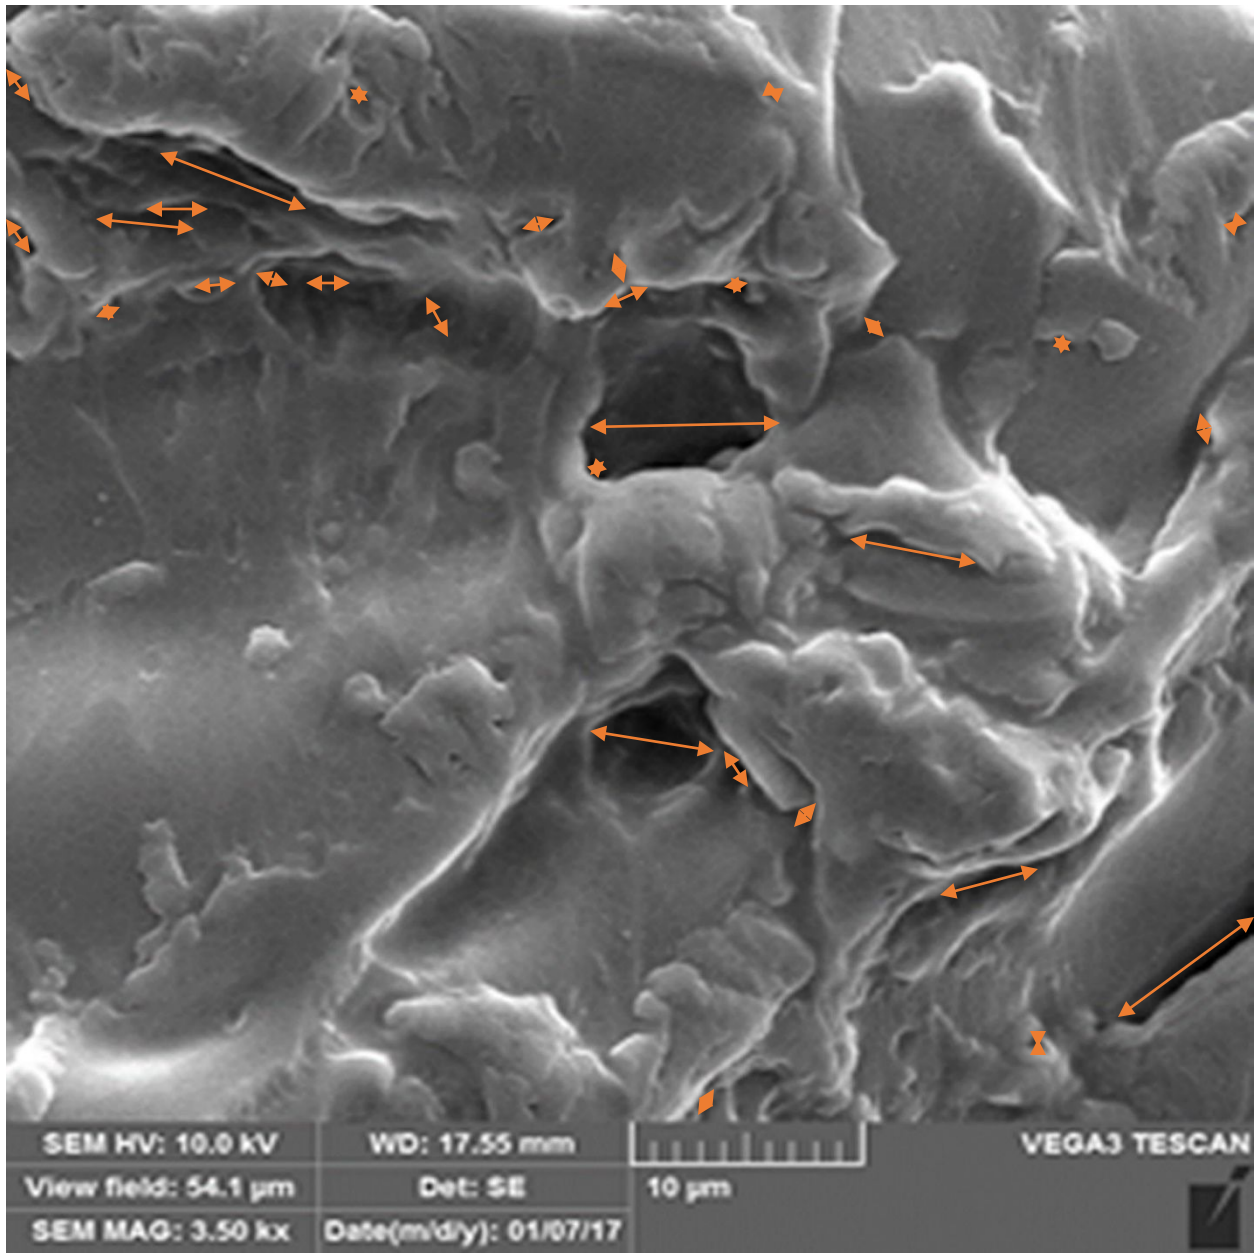

(b)

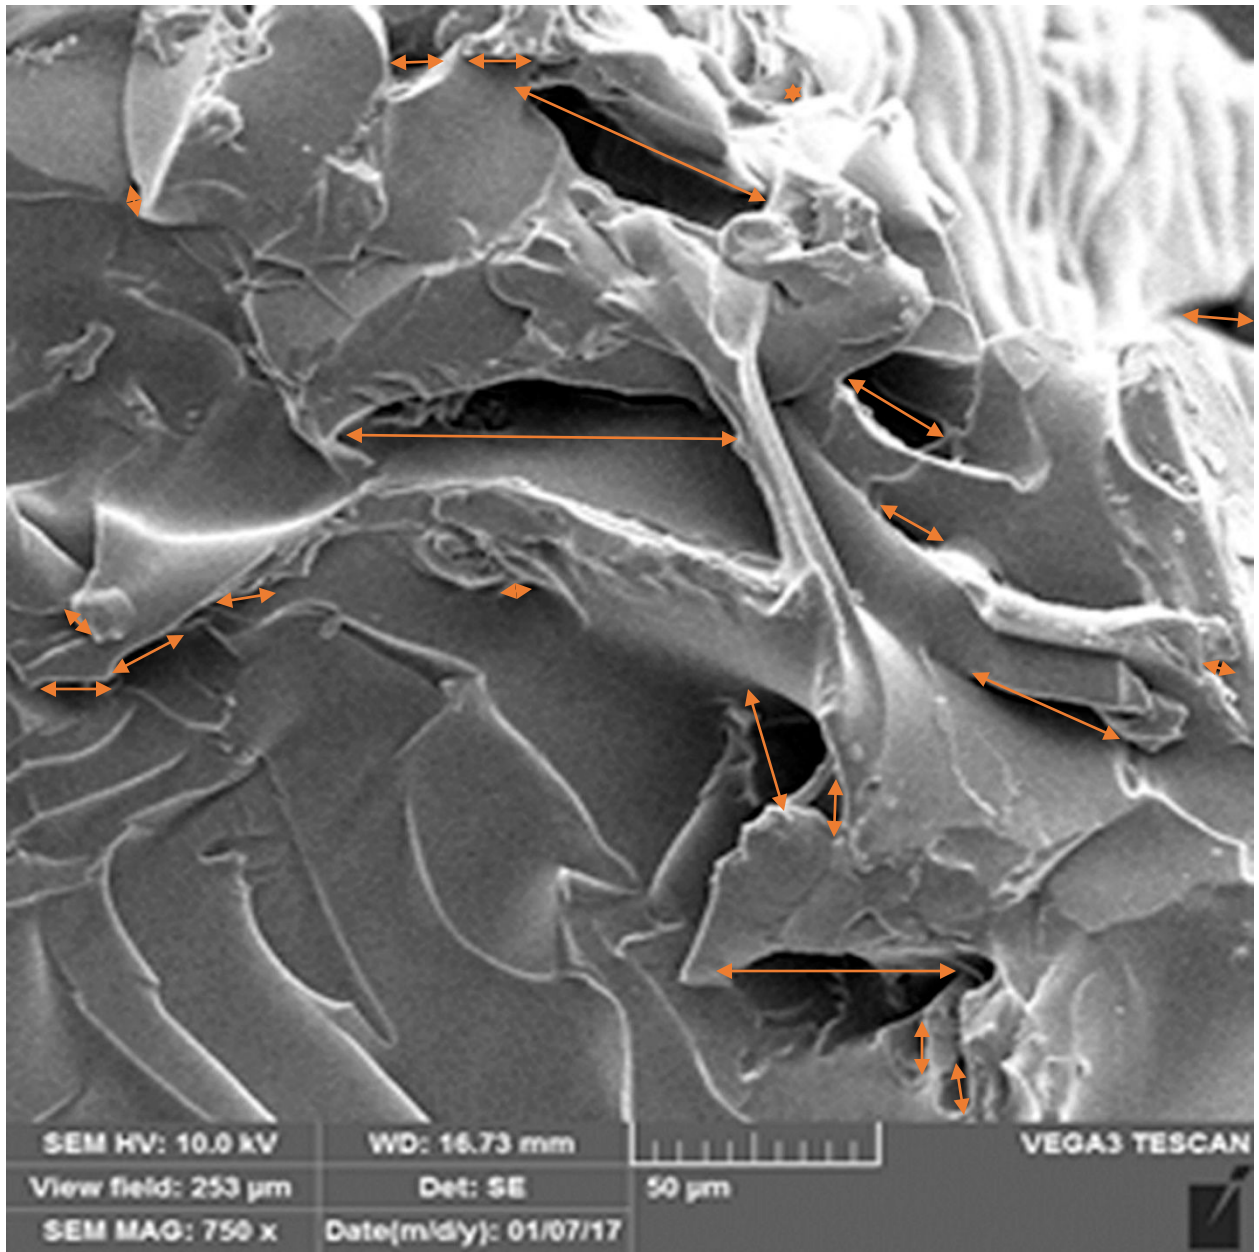

(c)

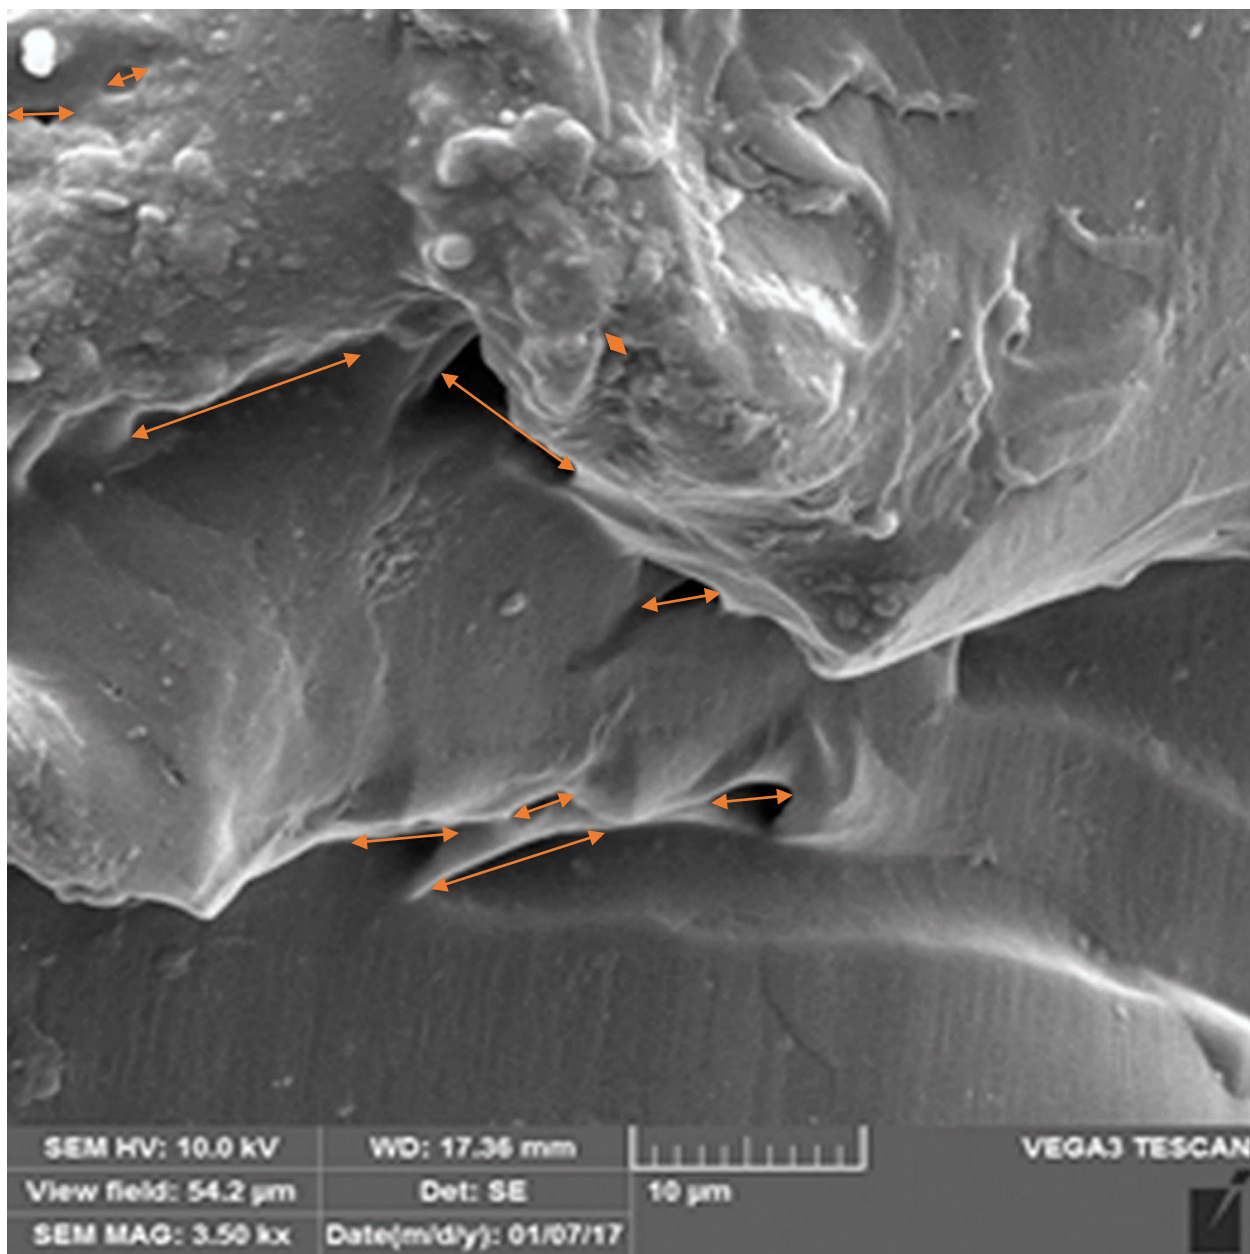

(d)

**Figure S1:** Scanning electron microscopy (SEM) images of samples (a) 1, (b) 2, (c) 4 and (d) 7.



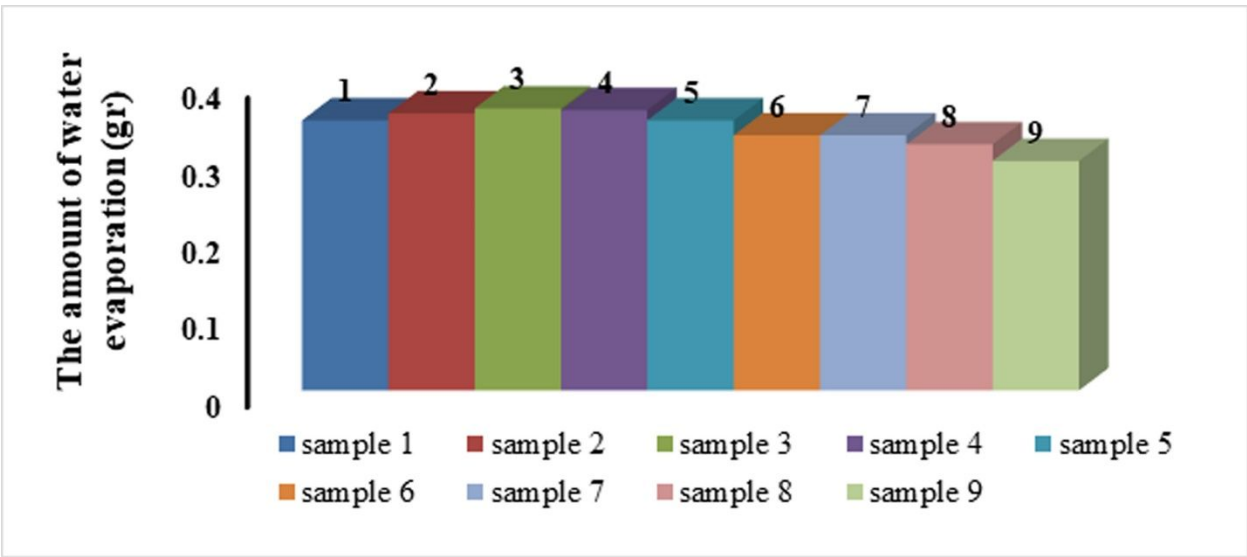

(a)

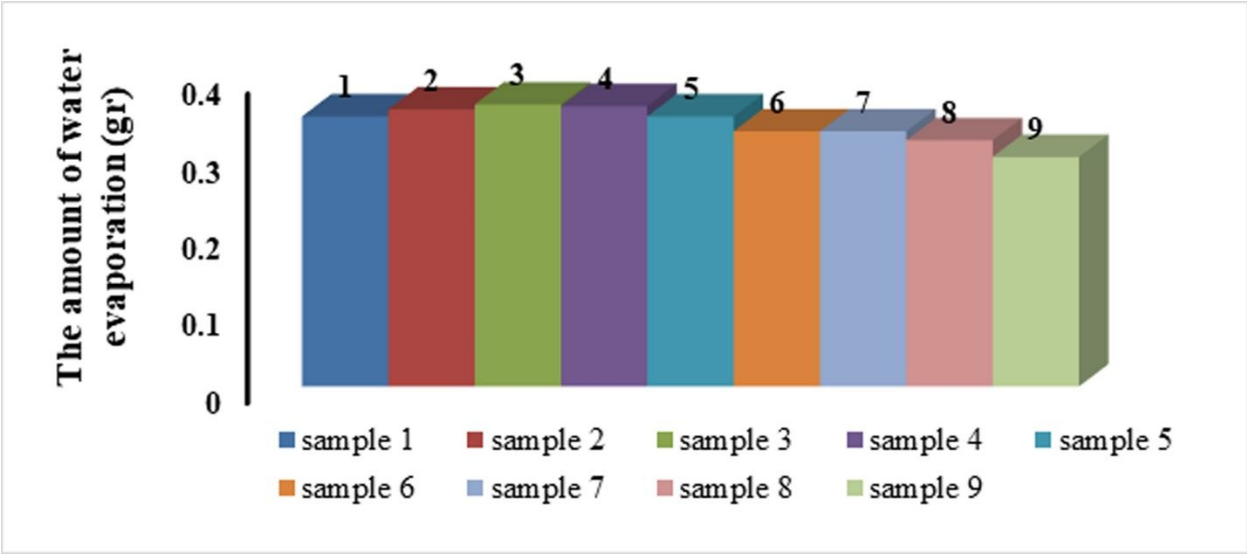

(b)

Figure S2: The amount of evaporated water from samples (a) in the oven and (b) vacuum oven.

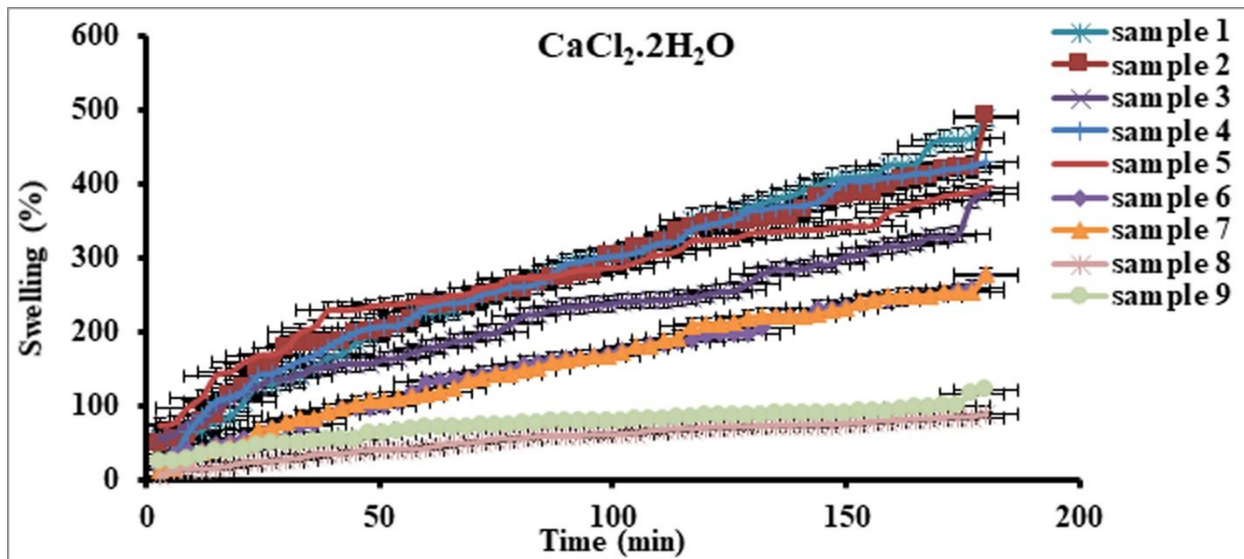

(a)

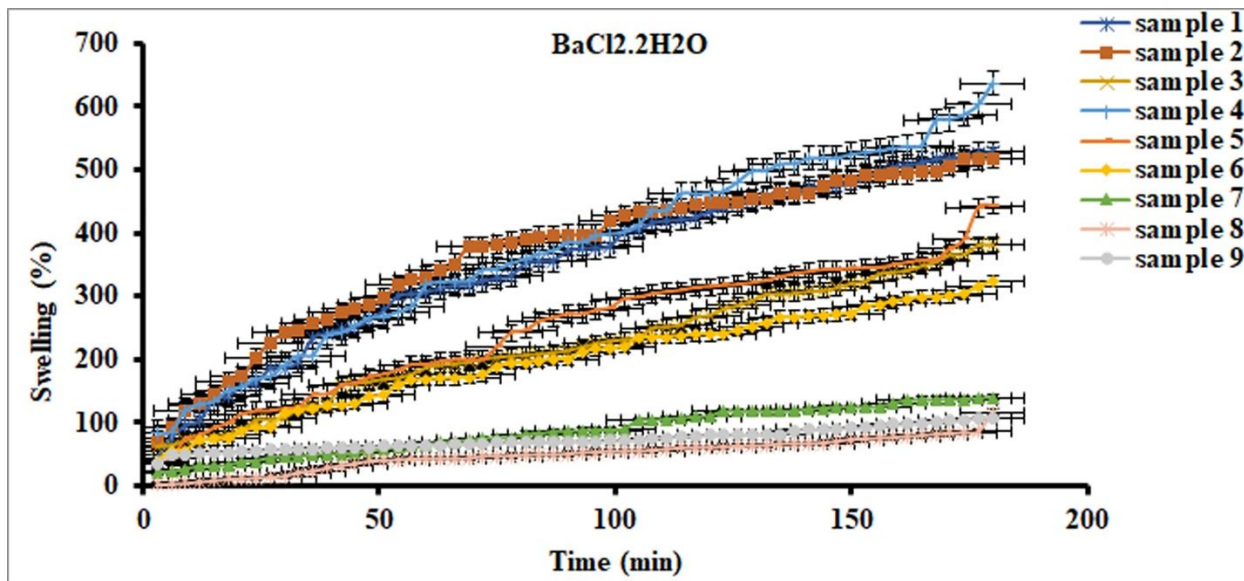

(b)

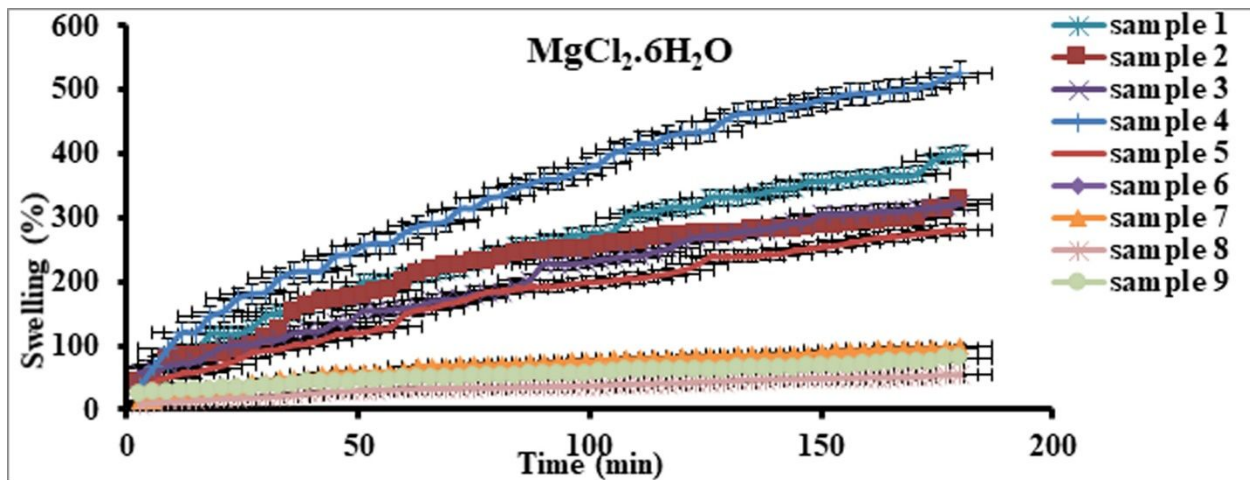

(c)

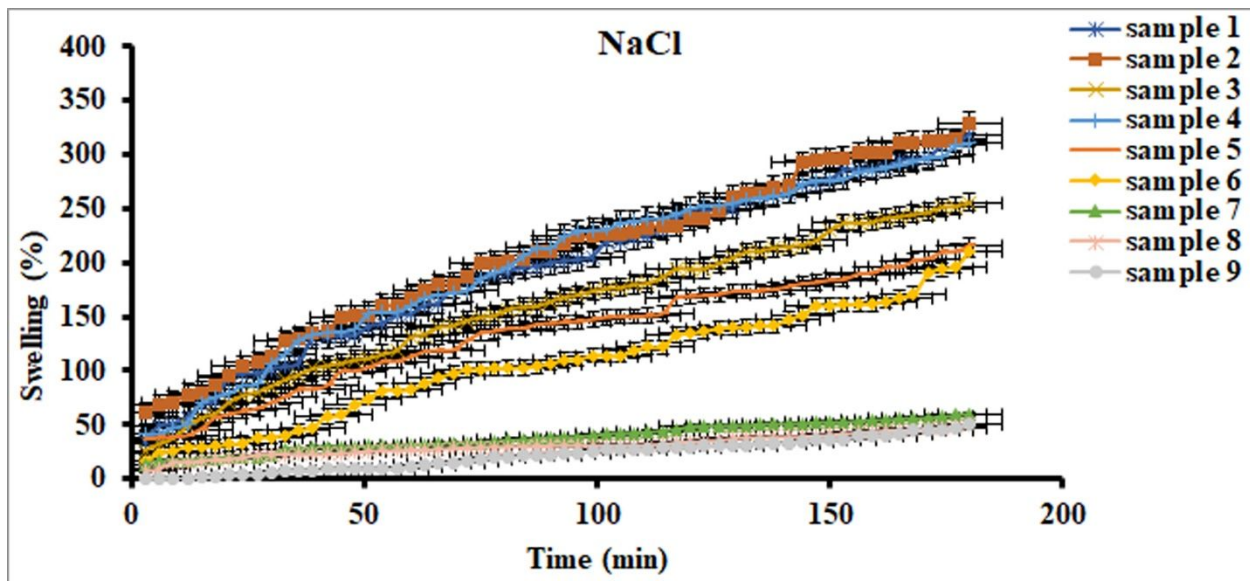

(d)



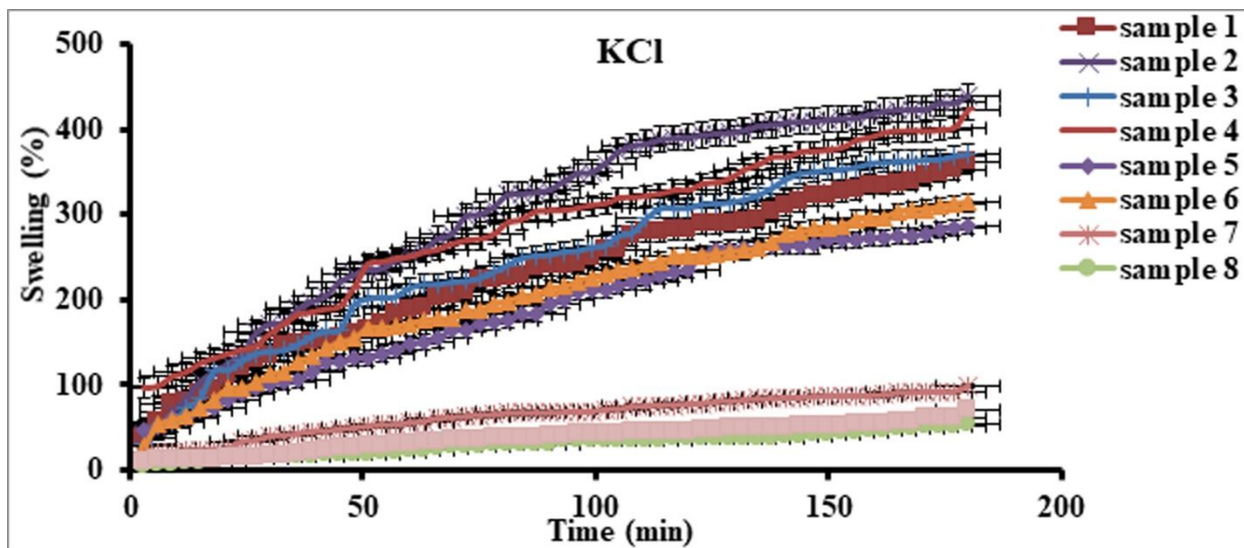

(e)

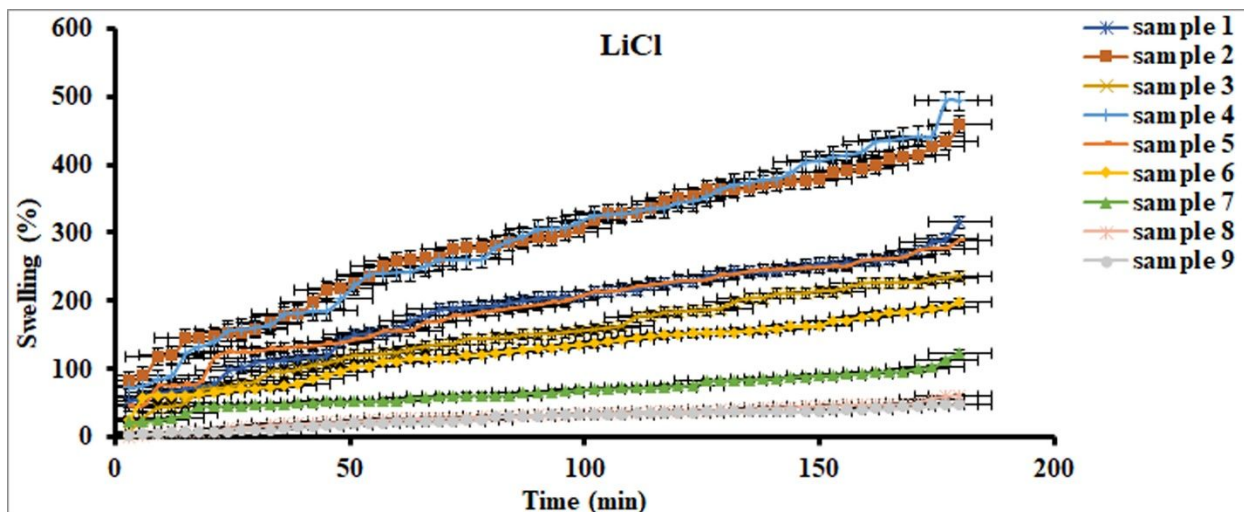

(f)

**Figure S3:** Swelling percentage of samples (%S) versus time in (a)  $\text{CaCl}_2 \cdot 2\text{H}_2\text{O}$  (b)  $\text{BaCl}_2 \cdot 2\text{H}_2\text{O}$  (c)  $\text{MgCl}_2 \cdot 6\text{H}_2\text{O}$  (d)  $\text{NaCl}$  (e)  $\text{KCl}$  (f)  $\text{LiCl}$  saline solution.

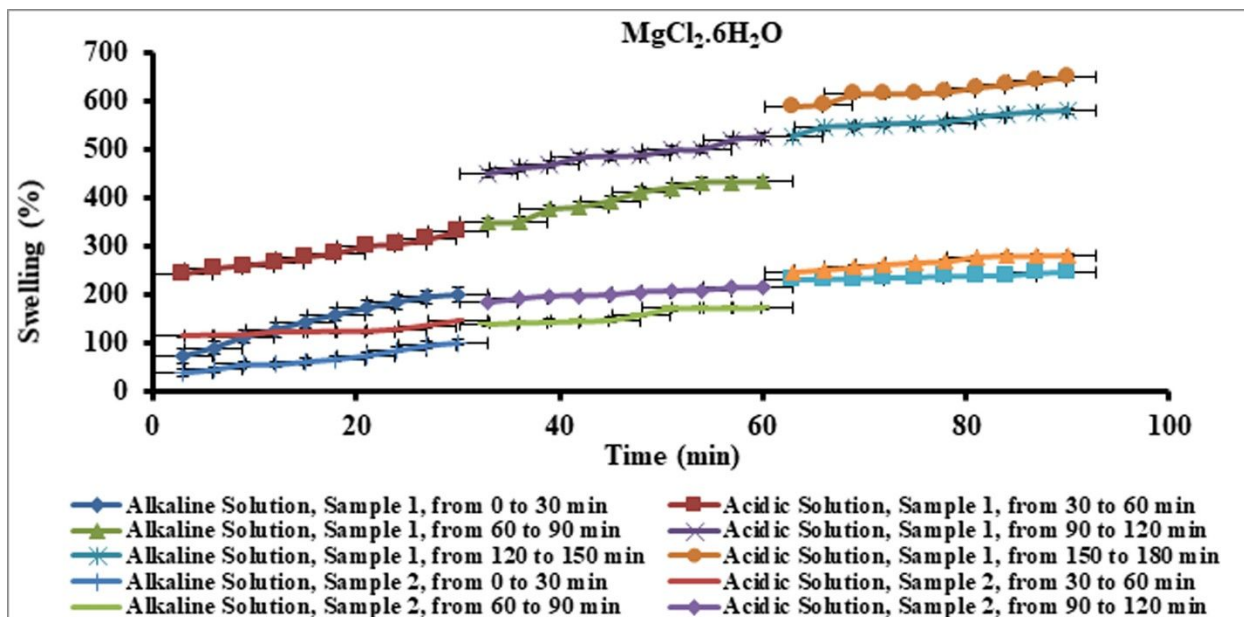

(a)

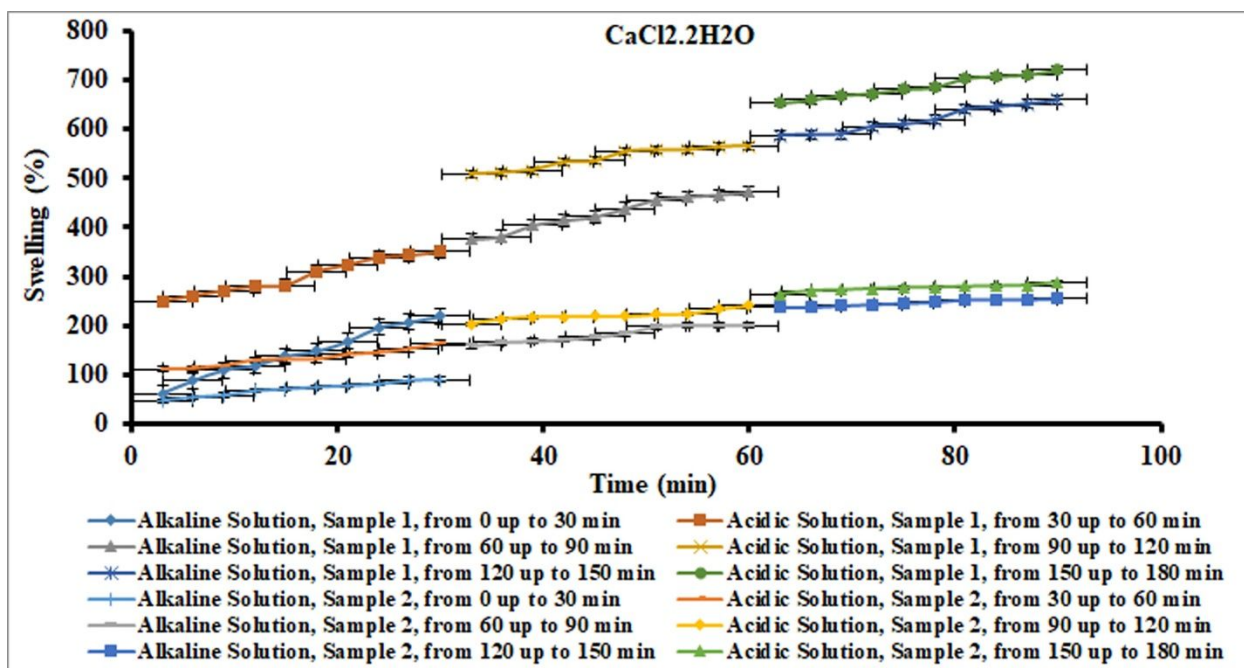

(b)

Figure S4: Swelling percentage of samples (%S) in alkaline and acidic media (a) MgCl<sub>2</sub>.6H<sub>2</sub>O

(b) CaCl<sub>2</sub>.2H<sub>2</sub>O saline solution.

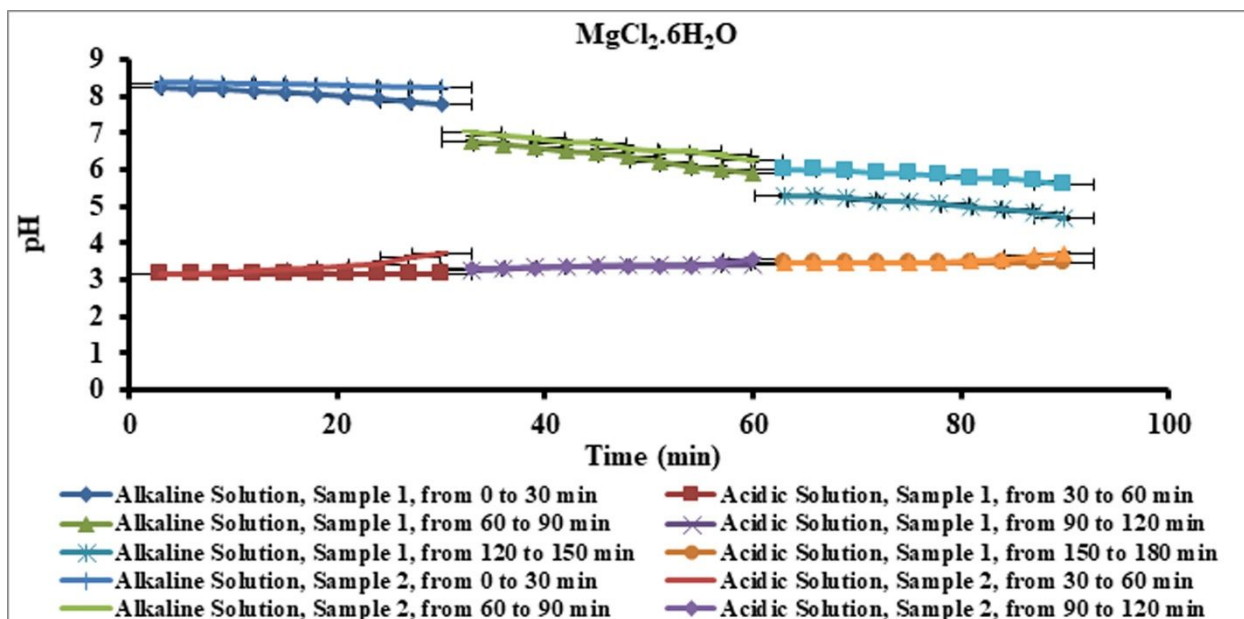

(a)

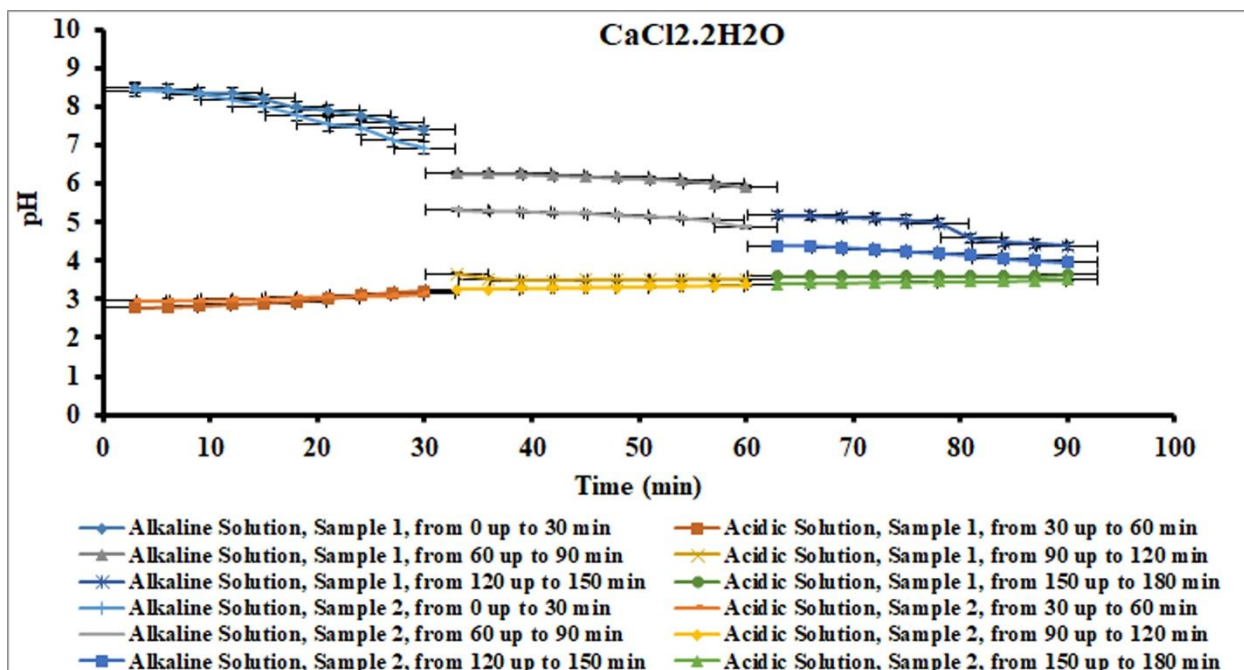

(b)

Figure S5: pH variation versus time (a) MgCl<sub>2</sub>.6H<sub>2</sub>O (b) CaCl<sub>2</sub>.2H<sub>2</sub>O saline solution.

Table S1 The amount of evaporated water (gr) in the oven.

| Sample | AAm/AA (mole ratio) | MBA (mole %) | The amount of evaporated water (gr) |
|--------|---------------------|--------------|-------------------------------------|
| 1      | 9.65                | 6            | 0.3240                              |
| 2      | 9.65                | 14           | 0.2991                              |
| 3      | 9.65                | 18           | 0.2947                              |
| 4      | 4.82                | 6            | 0.3282                              |
| 5      | 4.82                | 14           | 0.3039                              |
| 6      | 4.82                | 18           | 0.3362                              |
| 7      | 2.41                | 6            | 0.3288                              |
| 8      | 2.41                | 14           | 0.3272                              |
| 9      | 2.41                | 18           | 0.3002                              |

Table S2 The amount of evaporated water (gr) in the vacuum oven.

| Sample | AAm/AA (mole ratio) | MBA (mole %) | The amount of evaporated water (gr) |
|--------|---------------------|--------------|-------------------------------------|
| 1      | 9.65                | 6            | 0.0176                              |
| 2      | 9.65                | 14           | 0.0206                              |
| 3      | 9.65                | 18           | 0.0268                              |
| 4      | 4.82                | 6            | 0.0154                              |
| 5      | 4.82                | 14           | 0.0155                              |
| 6      | 4.82                | 18           | 0.0211                              |
| 7      | 2.41                | 6            | 0.0207                              |
| 8      | 2.41                | 14           | 0.0228                              |
| 9      | 2.41                | 18           | 0.0176                              |



Table S3 Swelling percentage of samples (%S) in BaCl<sub>2</sub>·2H<sub>2</sub>O saline solution over time.

| Time (min) | Sample 1 | Sample 2 | Sample 3 | Sample 4 | Sample 5 | Sample 6 | Sample 7 | Sample 8 | Sample 9 |
|------------|----------|----------|----------|----------|----------|----------|----------|----------|----------|
| 3          | 84       | 44       | 38       | 21       | 2        | 34       | 41       | 70       | 62       |
| 6          | 85       | 44       | 55       | 22       | 3        | 50       | 76       | 91       | 63       |
| 9          | 118      | 74       | 56       | 26       | 5        | 50       | 95       | 118      | 71       |
| 12         | 128      | 80       | 71       | 31       | 7        | 51       | 103      | 130      | 72       |
| 15         | 133      | 91       | 74       | 31       | 9        | 52       | 135      | 144      | 75       |
| 18         | 151      | 100      | 75       | 32       | 11       | 53       | 141      | 165      | 81       |
| 21         | 157      | 114      | 86       | 38       | 12       | 54       | 159      | 173      | 88       |
| 24         | 169      | 118      | 91       | 39       | 13       | 56       | 162      | 202      | 104      |
| 27         | 172      | 119      | 93       | 45       | 14       | 57       | 185      | 226      | 104      |
| 30         | 191      | 123      | 115      | 45       | 16       | 57       | 186      | 242      | 107      |
| 33         | 206      | 126      | 119      | 46       | 22       | 58       | 197      | 244      | 123      |
| 36         | 207      | 143      | 122      | 48       | 23       | 58       | 233      | 258      | 127      |
| 39         | 237      | 145      | 127      | 49       | 29       | 60       | 241      | 264      | 128      |
| 42         | 241      | 158      | 128      | 50       | 32       | 61       | 248      | 274      | 159      |
| 45         | 254      | 163      | 130      | 51       | 35       | 61       | 250      | 280      | 161      |
| 48         | 265      | 172      | 141      | 54       | 40       | 62       | 264      | 285      | 164      |
| 51         | 267      | 177      | 143      | 58       | 40       | 63       | 277      | 297      | 169      |
| 54         | 275      | 183      | 159      | 61       | 42       | 64       | 300      | 317      | 170      |
| 57         | 284      | 192      | 166      | 64       | 43       | 64       | 303      | 326      | 176      |
| 60         | 317      | 192      | 169      | 65       | 43       | 64       | 306      | 330      | 187      |
| 63         | 322      | 197      | 169      | 68       | 44       | 65       | 311      | 340      | 191      |
| 66         | 323      | 199      | 170      | 71       | 44       | 66       | 317      | 350      | 192      |
| 69         | 324      | 200      | 171      | 71       | 44       | 66       | 318      | 378      | 196      |
| 72         | 341      | 200      | 175      | 74       | 47       | 67       | 324      | 378      | 201      |
| 75         | 343      | 220      | 189      | 75       | 48       | 69       | 328      | 381      | 203      |
| 78         | 351      | 242      | 194      | 76       | 48       | 69       | 332      | 386      | 205      |
| 81         | 359      | 246      | 195      | 81       | 49       | 69       | 352      | 389      | 207      |
| 84         | 366      | 260      | 197      | 82       | 50       | 69       | 356      | 393      | 208      |
| 87         | 372      | 266      | 200      | 85       | 50       | 69       | 356      | 395      | 211      |
| 90         | 384      | 272      | 201      | 86       | 51       | 70       | 372      | 396      | 214      |
| 93         | 385      | 272      | 211      | 87       | 53       | 71       | 376      | 396      | 219      |
| 96         | 395      | 278      | 216      | 88       | 53       | 71       | 376      | 397      | 225      |
| 99         | 398      | 281      | 217      | 88       | 55       | 71       | 379      | 418      | 229      |
| 102        | 401      | 295      | 220      | 90       | 55       | 72       | 403      | 427      | 231      |
| 105        | 412      | 298      | 234      | 103      | 55       | 72       | 406      | 432      | 236      |
| 108        | 435      | 303      | 235      | 104      | 56       | 76       | 416      | 432      | 249      |
| 111        | 436      | 307      | 235      | 105      | 59       | 76       | 419      | 436      | 252      |
| 114        | 461      | 309      | 237      | 107      | 61       | 78       | 421      | 438      | 255      |

|     |     |     |     |     |     |     |     |     |     |
|-----|-----|-----|-----|-----|-----|-----|-----|-----|-----|
| 117 | 462 | 313 | 239 | 109 | 61  | 79  | 424 | 445 | 266 |
| 120 | 463 | 315 | 240 | 110 | 61  | 80  | 433 | 448 | 270 |
| 123 | 466 | 317 | 240 | 117 | 62  | 80  | 439 | 449 | 280 |
| 126 | 480 | 318 | 246 | 117 | 63  | 80  | 444 | 449 | 285 |
| 129 | 497 | 321 | 252 | 117 | 64  | 81  | 450 | 452 | 293 |
| 132 | 498 | 324 | 258 | 118 | 64  | 82  | 457 | 455 | 303 |
| 135 | 508 | 330 | 266 | 118 | 67  | 82  | 462 | 462 | 303 |
| 138 | 510 | 335 | 267 | 118 | 67  | 88  | 463 | 462 | 305 |
| 141 | 518 | 338 | 268 | 121 | 67  | 89  | 470 | 462 | 308 |
| 144 | 518 | 341 | 270 | 122 | 68  | 90  | 474 | 474 | 309 |
| 147 | 518 | 342 | 271 | 124 | 71  | 91  | 474 | 482 | 314 |
| 150 | 524 | 343 | 273 | 124 | 74  | 91  | 478 | 483 | 321 |
| 153 | 527 | 344 | 282 | 124 | 74  | 92  | 488 | 490 | 324 |
| 156 | 530 | 345 | 287 | 124 | 76  | 95  | 497 | 491 | 336 |
| 159 | 533 | 349 | 291 | 130 | 77  | 97  | 504 | 493 | 338 |
| 162 | 537 | 353 | 295 | 135 | 79  | 98  | 507 | 493 | 341 |
| 165 | 539 | 356 | 298 | 136 | 80  | 99  | 511 | 498 | 348 |
| 168 | 577 | 357 | 298 | 136 | 82  | 102 | 517 | 498 | 355 |
| 171 | 580 | 374 | 300 | 136 | 83  | 103 | 518 | 507 | 366 |
| 174 | 587 | 389 | 304 | 136 | 85  | 104 | 521 | 516 | 367 |
| 177 | 603 | 439 | 314 | 138 | 86  | 108 | 525 | 517 | 381 |
| 180 | 637 | 443 | 324 | 139 | 117 | 108 | 527 | 518 | 382 |

Table S4 Swelling percentage of samples (%S) in CaCl<sub>2</sub>·2H<sub>2</sub>O saline solution over time.

| Time (min) | Sample 1 | Sample 2 | Sample 3 | Sample 4 | Sample 5 | Sample 6 | Sample 7 | Sample 8 | Sample 9 |
|------------|----------|----------|----------|----------|----------|----------|----------|----------|----------|
| 3          | 53       | 49       | 56       | 14       | 73       | 18       | 14       | 4        | 23       |
| 6          | 55       | 55       | 61       | 30       | 76       | 35       | 15       | 12       | 24       |
| 9          | 61       | 57       | 77       | 63       | 98       | 38       | 23       | 13       | 25       |
| 12         | 68       | 79       | 78       | 86       | 111      | 39       | 37       | 14       | 32       |
| 15         | 79       | 85       | 98       | 105      | 141      | 48       | 43       | 15       | 38       |
| 18         | 85       | 111      | 108      | 110      | 145      | 51       | 46       | 18       | 38       |
| 21         | 106      | 122      | 117      | 118      | 158      | 55       | 47       | 23       | 39       |
| 24         | 128      | 151      | 126      | 140      | 168      | 57       | 68       | 23       | 45       |
| 27         | 129      | 153      | 136      | 142      | 169      | 70       | 70       | 24       | 47       |
| 30         | 137      | 179      | 137      | 151      | 177      | 71       | 77       | 26       | 48       |
| 33         | 140      | 182      | 143      | 160      | 199      | 73       | 84       | 28       | 49       |
| 36         | 152      | 183      | 150      | 167      | 206      | 74       | 84       | 33       | 50       |
| 39         | 165      | 183      | 152      | 179      | 228      | 89       | 92       | 34       | 52       |
| 42         | 169      | 185      | 157      | 189      | 229      | 95       | 97       | 34       | 53       |
| 45         | 185      | 197      | 157      | 199      | 230      | 97       | 103      | 38       | 53       |
| 48         | 195      | 200      | 157      | 204      | 233      | 97       | 106      | 39       | 62       |
| 51         | 207      | 202      | 163      | 207      | 236      | 99       | 108      | 40       | 62       |
| 54         | 214      | 208      | 165      | 207      | 237      | 106      | 109      | 40       | 65       |
| 57         | 227      | 215      | 172      | 218      | 239      | 117      | 113      | 41       | 67       |
| 60         | 227      | 235      | 178      | 232      | 240      | 131      | 115      | 41       | 69       |
| 63         | 228      | 235      | 181      | 237      | 243      | 134      | 119      | 46       | 69       |
| 66         | 230      | 236      | 187      | 238      | 249      | 137      | 123      | 47       | 70       |
| 69         | 240      | 237      | 189      | 241      | 251      | 138      | 135      | 49       | 70       |
| 72         | 248      | 249      | 197      | 250      | 259      | 144      | 138      | 51       | 72       |
| 75         | 253      | 251      | 199      | 254      | 262      | 145      | 143      | 54       | 73       |
| 78         | 258      | 256      | 211      | 259      | 273      | 147      | 144      | 54       | 73       |
| 81         | 263      | 258      | 222      | 260      | 273      | 157      | 149      | 55       | 74       |
| 84         | 272      | 265      | 224      | 265      | 273      | 159      | 151      | 58       | 75       |
| 87         | 281      | 273      | 231      | 276      | 274      | 163      | 158      | 58       | 76       |
| 90         | 291      | 274      | 234      | 291      | 279      | 164      | 161      | 58       | 77       |
| 93         | 294      | 279      | 235      | 293      | 283      | 165      | 164      | 58       | 77       |
| 96         | 294      | 280      | 237      | 298      | 284      | 166      | 166      | 60       | 77       |
| 99         | 299      | 302      | 238      | 301      | 286      | 170      | 167      | 60       | 77       |
| 102        | 307      | 303      | 241      | 303      | 287      | 175      | 172      | 61       | 78       |
| 105        | 311      | 314      | 242      | 306      | 294      | 179      | 180      | 62       | 79       |
| 108        | 317      | 314      | 243      | 315      | 301      | 183      | 181      | 66       | 80       |
| 111        | 326      | 320      | 243      | 320      | 304      | 183      | 188      | 67       | 81       |
| 114        | 332      | 336      | 245      | 322      | 309      | 187      | 192      | 68       | 83       |

|     |     |     |     |     |     |     |     |    |     |
|-----|-----|-----|-----|-----|-----|-----|-----|----|-----|
| 117 | 352 | 340 | 247 | 338 | 323 | 189 | 209 | 68 | 83  |
| 120 | 355 | 346 | 251 | 343 | 323 | 194 | 210 | 69 | 85  |
| 123 | 355 | 347 | 255 | 347 | 324 | 196 | 212 | 70 | 86  |
| 126 | 359 | 347 | 256 | 352 | 325 | 196 | 213 | 71 | 86  |
| 129 | 367 | 349 | 266 | 363 | 333 | 198 | 219 | 71 | 86  |
| 132 | 373 | 351 | 279 | 365 | 335 | 205 | 221 | 72 | 87  |
| 135 | 379 | 353 | 285 | 368 | 335 | 220 | 221 | 72 | 87  |
| 138 | 382 | 353 | 285 | 370 | 337 | 220 | 221 | 72 | 88  |
| 141 | 391 | 365 | 286 | 370 | 338 | 222 | 222 | 73 | 88  |
| 144 | 396 | 380 | 292 | 375 | 338 | 233 | 222 | 73 | 89  |
| 147 | 405 | 380 | 292 | 390 | 340 | 233 | 229 | 73 | 89  |
| 150 | 408 | 385 | 303 | 403 | 342 | 235 | 231 | 75 | 90  |
| 153 | 409 | 387 | 304 | 403 | 342 | 238 | 240 | 75 | 91  |
| 156 | 412 | 387 | 312 | 405 | 344 | 242 | 244 | 78 | 92  |
| 159 | 424 | 398 | 316 | 410 | 362 | 242 | 247 | 79 | 92  |
| 162 | 425 | 406 | 317 | 410 | 367 | 245 | 248 | 80 | 95  |
| 165 | 426 | 409 | 321 | 414 | 374 | 248 | 249 | 81 | 98  |
| 168 | 452 | 412 | 328 | 414 | 377 | 249 | 249 | 81 | 98  |
| 171 | 458 | 419 | 329 | 419 | 383 | 251 | 252 | 83 | 99  |
| 174 | 459 | 420 | 332 | 420 | 386 | 255 | 253 | 84 | 100 |
| 177 | 462 | 421 | 378 | 424 | 389 | 260 | 254 | 84 | 116 |
| 180 | 488 | 491 | 387 | 429 | 394 | 276 | 278 | 87 | 120 |

**Table S5** Swelling percentage of samples (%S) in MgCl<sub>2</sub>·2H<sub>2</sub>O saline solution over time.

| Time (min) | Sample 1 | Sample 2 | Sample 3 | Sample 4 | Sample 5 | Sample 6 | Sample 7 | Sample 8 | Sample 9 |
|------------|----------|----------|----------|----------|----------|----------|----------|----------|----------|
| 3          | 13       | 43       | 59       | 35       | 24       | 12       | 41       | 70       | 62       |
| 6          | 52       | 49       | 64       | 67       | 43       | 14       | 76       | 91       | 63       |
| 9          | 71       | 78       | 69       | 94       | 51       | 22       | 95       | 118      | 71       |
| 12         | 86       | 82       | 73       | 119      | 57       | 23       | 103      | 130      | 72       |
| 15         | 88       | 84       | 76       | 120      | 59       | 23       | 135      | 144      | 75       |
| 18         | 117      | 85       | 87       | 145      | 65       | 33       | 141      | 165      | 81       |
| 21         | 117      | 87       | 100      | 153      | 70       | 34       | 159      | 173      | 88       |
| 24         | 117      | 91       | 102      | 173      | 78       | 35       | 162      | 202      | 104      |
| 27         | 127      | 99       | 102      | 180      | 89       | 41       | 185      | 226      | 104      |
| 30         | 145      | 111      | 109      | 183      | 93       | 41       | 186      | 242      | 107      |
| 33         | 150      | 125      | 110      | 205      | 95       | 48       | 197      | 244      | 123      |
| 36         | 153      | 152      | 120      | 215      | 102      | 49       | 233      | 258      | 127      |
| 39         | 165      | 160      | 122      | 216      | 103      | 49       | 241      | 264      | 128      |
| 42         | 174      | 167      | 124      | 216      | 109      | 55       | 248      | 274      | 159      |
| 45         | 175      | 170      | 136      | 239      | 117      | 57       | 250      | 280      | 161      |
| 48         | 181      | 172      | 137      | 242      | 119      | 57       | 264      | 285      | 164      |
| 51         | 198      | 178      | 154      | 256      | 121      | 57       | 277      | 297      | 169      |
| 54         | 199      | 184      | 155      | 259      | 126      | 59       | 300      | 317      | 170      |
| 57         | 199      | 187      | 157      | 260      | 129      | 59       | 303      | 326      | 176      |
| 60         | 209      | 198      | 159      | 276      | 149      | 60       | 306      | 330      | 187      |
| 63         | 213      | 213      | 163      | 286      | 157      | 67       | 311      | 340      | 191      |
| 66         | 215      | 219      | 170      | 290      | 159      | 68       | 317      | 350      | 192      |
| 69         | 218      | 224      | 173      | 294      | 166      | 68       | 318      | 378      | 196      |
| 72         | 222      | 225      | 173      | 313      | 170      | 69       | 324      | 378      | 201      |
| 75         | 231      | 231      | 181      | 315      | 177      | 70       | 328      | 381      | 203      |
| 78         | 240      | 232      | 183      | 330      | 185      | 70       | 332      | 386      | 205      |
| 81         | 244      | 238      | 184      | 334      | 185      | 71       | 352      | 389      | 207      |
| 84         | 255      | 242      | 194      | 346      | 188      | 72       | 356      | 393      | 208      |
| 87         | 255      | 245      | 202      | 352      | 192      | 72       | 356      | 395      | 211      |
| 90         | 263      | 246      | 227      | 360      | 193      | 72       | 372      | 396      | 214      |
| 93         | 263      | 248      | 228      | 360      | 193      | 74       | 376      | 396      | 219      |
| 96         | 271      | 248      | 228      | 368      | 197      | 75       | 376      | 397      | 225      |
| 99         | 273      | 250      | 230      | 378      | 199      | 75       | 379      | 418      | 229      |
| 102        | 275      | 256      | 235      | 383      | 200      | 78       | 403      | 427      | 231      |
| 105        | 278      | 259      | 237      | 401      | 202      | 78       | 406      | 432      | 236      |
| 108        | 301      | 260      | 240      | 406      | 205      | 79       | 416      | 432      | 249      |
| 111        | 306      | 261      | 240      | 416      | 206      | 80       | 419      | 436      | 252      |
| 114        | 309      | 269      | 247      | 416      | 210      | 80       | 421      | 438      | 255      |



|     |     |     |     |     |     |     |     |     |     |
|-----|-----|-----|-----|-----|-----|-----|-----|-----|-----|
| 117 | 316 | 270 | 252 | 427 | 213 | 80  | 424 | 445 | 266 |
| 120 | 316 | 272 | 262 | 432 | 218 | 82  | 433 | 448 | 270 |
| 123 | 318 | 273 | 269 | 433 | 226 | 83  | 439 | 449 | 280 |
| 126 | 331 | 274 | 272 | 436 | 239 | 84  | 444 | 449 | 285 |
| 129 | 332 | 275 | 274 | 452 | 239 | 84  | 450 | 452 | 293 |
| 132 | 332 | 276 | 278 | 462 | 239 | 84  | 457 | 455 | 303 |
| 135 | 335 | 280 | 279 | 464 | 240 | 85  | 462 | 462 | 303 |
| 138 | 339 | 280 | 282 | 465 | 243 | 85  | 463 | 462 | 305 |
| 141 | 345 | 281 | 288 | 468 | 244 | 85  | 470 | 462 | 308 |
| 144 | 347 | 282 | 292 | 473 | 249 | 87  | 474 | 474 | 309 |
| 147 | 355 | 283 | 294 | 477 | 251 | 87  | 474 | 482 | 314 |
| 150 | 357 | 287 | 306 | 484 | 254 | 90  | 478 | 483 | 321 |
| 153 | 358 | 288 | 306 | 488 | 257 | 92  | 488 | 490 | 324 |
| 156 | 360 | 289 | 307 | 493 | 261 | 93  | 497 | 491 | 336 |
| 159 | 363 | 292 | 308 | 494 | 265 | 93  | 504 | 493 | 338 |
| 162 | 364 | 294 | 310 | 496 | 269 | 94  | 507 | 493 | 341 |
| 165 | 365 | 296 | 310 | 498 | 270 | 94  | 511 | 498 | 348 |
| 168 | 365 | 297 | 311 | 500 | 273 | 95  | 517 | 498 | 355 |
| 171 | 369 | 298 | 315 | 503 | 275 | 95  | 518 | 507 | 366 |
| 174 | 388 | 313 | 315 | 509 | 278 | 96  | 521 | 516 | 367 |
| 177 | 397 | 313 | 319 | 519 | 280 | 97  | 525 | 517 | 381 |
| 180 | 400 | 328 | 322 | 526 | 282 | 100 | 527 | 518 | 382 |

**Table S6** Swelling percentage of samples (%S) in NaCl saline solution over time.

| Time (min) | Sample 1 | Sample 2 | Sample 3 | Sample 4 | Sample 5 | Sample 6 | Sample 7 | Sample 8 | Sample 9 |
|------------|----------|----------|----------|----------|----------|----------|----------|----------|----------|
| 3          | 35       | 61       | 26       | 41       | 37       | 16       | 14       | 7        | 0        |
| 6          | 49       | 68       | 32       | 42       | 38       | 24       | 16       | 9        | 0        |
| 9          | 51       | 71       | 37       | 47       | 39       | 26       | 17       | 15       | 1        |
| 12         | 57       | 78       | 48       | 51       | 40       | 30       | 17       | 15       | 1        |
| 15         | 69       | 80       | 56       | 70       | 46       | 30       | 18       | 16       | 2        |
| 18         | 73       | 86       | 60       | 76       | 57       | 30       | 19       | 18       | 2        |
| 21         | 94       | 96       | 71       | 79       | 60       | 32       | 19       | 18       | 4        |
| 24         | 97       | 104      | 77       | 87       | 62       | 33       | 20       | 20       | 4        |
| 27         | 97       | 108      | 80       | 88       | 65       | 38       | 20       | 23       | 4        |
| 30         | 102      | 113      | 86       | 106      | 70       | 39       | 21       | 23       | 6        |
| 33         | 104      | 127      | 92       | 116      | 76       | 41       | 28       | 23       | 7        |
| 36         | 107      | 130      | 96       | 128      | 82       | 45       | 28       | 23       | 8        |
| 39         | 130      | 135      | 102      | 134      | 83       | 48       | 29       | 23       | 8        |
| 42         | 131      | 136      | 105      | 136      | 86       | 58       | 29       | 23       | 9        |
| 45         | 132      | 150      | 107      | 136      | 99       | 59       | 30       | 23       | 9        |
| 48         | 133      | 150      | 110      | 139      | 100      | 68       | 30       | 25       | 10       |
| 51         | 141      | 151      | 111      | 153      | 103      | 75       | 30       | 25       | 10       |
| 54         | 144      | 160      | 115      | 155      | 108      | 82       | 30       | 27       | 10       |
| 57         | 151      | 161      | 119      | 155      | 109      | 82       | 31       | 27       | 10       |
| 60         | 152      | 168      | 131      | 160      | 113      | 82       | 32       | 27       | 12       |
| 63         | 161      | 174      | 134      | 168      | 118      | 88       | 32       | 27       | 14       |
| 66         | 163      | 180      | 140      | 171      | 118      | 93       | 32       | 28       | 15       |
| 69         | 177      | 181      | 142      | 172      | 119      | 98       | 33       | 28       | 15       |
| 72         | 184      | 188      | 146      | 175      | 128      | 101      | 33       | 29       | 16       |
| 75         | 184      | 199      | 150      | 185      | 135      | 101      | 34       | 29       | 18       |
| 78         | 189      | 200      | 151      | 191      | 136      | 102      | 34       | 30       | 20       |
| 81         | 191      | 201      | 157      | 197      | 139      | 103      | 36       | 30       | 20       |
| 84         | 195      | 204      | 159      | 206      | 139      | 103      | 36       | 30       | 21       |
| 87         | 196      | 211      | 159      | 214      | 143      | 104      | 37       | 30       | 22       |
| 90         | 199      | 211      | 164      | 214      | 143      | 107      | 38       | 31       | 23       |
| 93         | 202      | 217      | 168      | 225      | 145      | 110      | 38       | 31       | 24       |
| 96         | 202      | 224      | 170      | 229      | 145      | 111      | 39       | 31       | 24       |
| 99         | 206      | 224      | 174      | 231      | 147      | 114      | 40       | 31       | 26       |
| 102        | 219      | 226      | 176      | 231      | 149      | 114      | 41       | 31       | 27       |
| 105        | 220      | 227      | 177      | 237      | 150      | 114      | 42       | 31       | 27       |
| 108        | 223      | 229      | 180      | 238      | 150      | 119      | 42       | 31       | 27       |
| 111        | 225      | 233      | 181      | 241      | 151      | 122      | 43       | 32       | 27       |
| 114        | 231      | 234      | 187      | 242      | 153      | 122      | 44       | 32       | 28       |

|     |     |     |     |     |     |     |    |    |    |
|-----|-----|-----|-----|-----|-----|-----|----|----|----|
| 117 | 242 | 234 | 194 | 246 | 167 | 133 | 46 | 34 | 30 |
| 120 | 243 | 241 | 194 | 250 | 169 | 134 | 48 | 34 | 30 |
| 123 | 248 | 241 | 194 | 254 | 170 | 136 | 49 | 35 | 30 |
| 126 | 249 | 249 | 199 | 254 | 170 | 139 | 49 | 36 | 31 |
| 129 | 250 | 261 | 204 | 255 | 173 | 140 | 49 | 38 | 31 |
| 132 | 258 | 264 | 210 | 259 | 174 | 140 | 49 | 39 | 32 |
| 135 | 261 | 264 | 211 | 260 | 174 | 141 | 50 | 39 | 33 |
| 138 | 263 | 270 | 214 | 262 | 175 | 142 | 51 | 39 | 33 |
| 141 | 265 | 272 | 214 | 265 | 178 | 147 | 51 | 39 | 33 |
| 144 | 271 | 293 | 216 | 274 | 181 | 152 | 51 | 39 | 34 |
| 147 | 274 | 295 | 220 | 276 | 181 | 160 | 52 | 40 | 35 |
| 150 | 277 | 296 | 230 | 276 | 184 | 160 | 52 | 41 | 37 |
| 153 | 285 | 297 | 236 | 278 | 184 | 161 | 52 | 42 | 37 |
| 156 | 286 | 302 | 236 | 284 | 189 | 161 | 53 | 43 | 40 |
| 159 | 286 | 302 | 237 | 286 | 190 | 162 | 54 | 44 | 40 |
| 162 | 288 | 302 | 241 | 289 | 195 | 164 | 54 | 45 | 41 |
| 165 | 294 | 310 | 243 | 291 | 196 | 168 | 55 | 45 | 41 |
| 168 | 295 | 311 | 245 | 294 | 201 | 171 | 55 | 46 | 45 |
| 171 | 296 | 312 | 247 | 298 | 204 | 190 | 56 | 47 | 45 |
| 174 | 309 | 313 | 251 | 299 | 209 | 194 | 57 | 47 | 45 |
| 177 | 312 | 314 | 252 | 309 | 210 | 197 | 59 | 50 | 47 |
| 180 | 318 | 329 | 256 | 311 | 216 | 211 | 60 | 50 | 52 |

Table S7 Swelling percentage of samples (%S) in KCl saline solution over time.

| Time (min) | Sample 1 | Sample 2 | Sample 3 | Sample 4 | Sample 5 | Sample 6 | Sample 7 | Sample 8 | Sample 9 |
|------------|----------|----------|----------|----------|----------|----------|----------|----------|----------|
| 3          | 37       | 43       | 30       | 96       | 47       | 29       | 16       | 4        | 10       |
| 6          | 55       | 50       | 52       | 98       | 51       | 53       | 20       | 8        | 10       |
| 9          | 78       | 69       | 56       | 109      | 60       | 59       | 21       | 8        | 11       |
| 12         | 79       | 84       | 73       | 115      | 62       | 64       | 22       | 9        | 11       |
| 15         | 88       | 105      | 83       | 125      | 71       | 72       | 23       | 9        | 12       |
| 18         | 93       | 113      | 116      | 131      | 73       | 83       | 24       | 12       | 12       |
| 21         | 111      | 126      | 117      | 136      | 83       | 96       | 25       | 13       | 13       |
| 24         | 120      | 136      | 128      | 141      | 90       | 97       | 33       | 14       | 14       |
| 27         | 129      | 161      | 137      | 146      | 95       | 102      | 34       | 15       | 14       |
| 30         | 134      | 172      | 139      | 160      | 101      | 113      | 40       | 16       | 16       |
| 33         | 145      | 173      | 140      | 171      | 104      | 116      | 40       | 17       | 16       |
| 36         | 148      | 190      | 147      | 182      | 106      | 128      | 42       | 17       | 18       |
| 39         | 150      | 198      | 157      | 185      | 115      | 133      | 45       | 17       | 21       |
| 42         | 153      | 205      | 163      | 189      | 126      | 142      | 45       | 17       | 22       |
| 45         | 155      | 221      | 165      | 192      | 127      | 151      | 48       | 19       | 25       |
| 48         | 159      | 229      | 193      | 213      | 131      | 154      | 49       | 19       | 26       |
| 51         | 165      | 235      | 201      | 241      | 131      | 166      | 51       | 19       | 27       |
| 54         | 171      | 237      | 202      | 244      | 136      | 167      | 53       | 20       | 28       |
| 57         | 184      | 246      | 203      | 248      | 140      | 168      | 53       | 22       | 31       |
| 60         | 188      | 252      | 213      | 250      | 148      | 172      | 55       | 22       | 31       |
| 63         | 190      | 258      | 218      | 255      | 150      | 176      | 57       | 24       | 33       |
| 66         | 201      | 272      | 218      | 258      | 154      | 177      | 60       | 26       | 34       |
| 69         | 204      | 277      | 221      | 265      | 164      | 178      | 61       | 27       | 34       |
| 72         | 210      | 298      | 222      | 269      | 165      | 186      | 62       | 28       | 36       |
| 75         | 222      | 300      | 225      | 271      | 170      | 186      | 64       | 28       | 36       |
| 78         | 223      | 309      | 233      | 276      | 174      | 196      | 65       | 29       | 36       |
| 81         | 224      | 323      | 240      | 290      | 176      | 198      | 67       | 29       | 36       |
| 84         | 227      | 324      | 249      | 294      | 182      | 204      | 67       | 30       | 37       |
| 87         | 237      | 326      | 252      | 303      | 182      | 205      | 67       | 31       | 38       |
| 90         | 238      | 329      | 253      | 304      | 196      | 213      | 67       | 31       | 39       |
| 93         | 239      | 339      | 256      | 304      | 200      | 215      | 68       | 34       | 39       |
| 96         | 241      | 348      | 257      | 307      | 209      | 221      | 68       | 34       | 42       |
| 99         | 248      | 350      | 261      | 311      | 211      | 226      | 68       | 35       | 42       |
| 102        | 258      | 360      | 264      | 312      | 211      | 230      | 71       | 35       | 42       |
| 105        | 258      | 374      | 275      | 319      | 216      | 235      | 71       | 35       | 43       |
| 108        | 275      | 381      | 279      | 320      | 220      | 237      | 74       | 36       | 43       |
| 111        | 279      | 383      | 296      | 321      | 222      | 241      | 75       | 36       | 43       |
| 114        | 279      | 388      | 307      | 324      | 227      | 245      | 76       | 36       | 44       |

|     |     |     |     |     |     |     |    |    |    |
|-----|-----|-----|-----|-----|-----|-----|----|----|----|
| 117 | 280 | 390 | 307 | 328 | 231 | 250 | 76 | 37 | 44 |
| 120 | 281 | 391 | 308 | 328 | 236 | 251 | 77 | 37 | 45 |
| 123 | 288 | 393 | 312 | 336 | 252 | 252 | 78 | 37 | 46 |
| 126 | 288 | 395 | 312 | 337 | 259 | 253 | 80 | 37 | 47 |
| 129 | 290 | 396 | 314 | 342 | 259 | 256 | 80 | 37 | 48 |
| 132 | 290 | 399 | 317 | 352 | 259 | 257 | 82 | 37 | 48 |
| 135 | 294 | 404 | 323 | 358 | 261 | 261 | 83 | 38 | 49 |
| 138 | 302 | 405 | 331 | 367 | 262 | 268 | 84 | 38 | 49 |
| 141 | 310 | 408 | 342 | 367 | 263 | 276 | 84 | 39 | 50 |
| 144 | 314 | 409 | 348 | 373 | 263 | 280 | 85 | 41 | 51 |
| 147 | 321 | 409 | 350 | 374 | 264 | 283 | 86 | 43 | 52 |
| 150 | 321 | 412 | 352 | 375 | 269 | 285 | 87 | 43 | 52 |
| 153 | 326 | 412 | 353 | 378 | 271 | 285 | 87 | 44 | 52 |
| 156 | 328 | 413 | 355 | 387 | 271 | 294 | 87 | 45 | 53 |
| 159 | 334 | 417 | 360 | 390 | 271 | 295 | 87 | 46 | 54 |
| 162 | 334 | 421 | 361 | 395 | 273 | 296 | 88 | 47 | 55 |
| 165 | 336 | 422 | 363 | 397 | 274 | 303 | 91 | 48 | 57 |
| 168 | 339 | 423 | 363 | 397 | 274 | 305 | 91 | 49 | 57 |
| 171 | 344 | 423 | 364 | 398 | 276 | 306 | 92 | 50 | 60 |
| 174 | 348 | 431 | 364 | 398 | 282 | 309 | 92 | 51 | 60 |
| 177 | 351 | 431 | 368 | 401 | 283 | 312 | 92 | 53 | 61 |
| 180 | 361 | 439 | 371 | 422 | 285 | 314 | 98 | 54 | 71 |



Table S8 Swelling percentage of samples (%S) in LiCl saline solution over time.

| Time (min) | Sample 1 | Sample 2 | Sample 3 | Sample 4 | Sample 5 | Sample 6 | Sample 7 | Sample 8 | Sample 9 |
|------------|----------|----------|----------|----------|----------|----------|----------|----------|----------|
| 3          | 53       | 83       | 9        | 72       | 46       | 26       | 23       | 0        | 3        |
| 6          | 60       | 90       | 29       | 76       | 47       | 58       | 24       | 4        | 5        |
| 9          | 66       | 119      | 43       | 85       | 75       | 60       | 25       | 6        | 5        |
| 12         | 68       | 121      | 45       | 91       | 76       | 61       | 29       | 7        | 7        |
| 15         | 71       | 145      | 51       | 123      | 78       | 62       | 35       | 8        | 8        |
| 18         | 76       | 147      | 68       | 133      | 82       | 63       | 46       | 9        | 9        |
| 21         | 79       | 150      | 71       | 140      | 117      | 66       | 46       | 9        | 9        |
| 24         | 98       | 154      | 73       | 156      | 125      | 69       | 47       | 14       | 9        |
| 27         | 102      | 155      | 78       | 158      | 125      | 71       | 47       | 15       | 11       |
| 30         | 111      | 160      | 82       | 162      | 126      | 72       | 48       | 16       | 11       |
| 33         | 111      | 168      | 95       | 165      | 131      | 73       | 48       | 19       | 11       |
| 36         | 114      | 179      | 96       | 181      | 131      | 75       | 48       | 20       | 14       |
| 39         | 116      | 180      | 100      | 182      | 133      | 80       | 50       | 20       | 15       |
| 42         | 119      | 200      | 105      | 186      | 134      | 85       | 52       | 21       | 16       |
| 45         | 120      | 217      | 108      | 186      | 137      | 91       | 52       | 22       | 18       |
| 48         | 141      | 217      | 114      | 203      | 139      | 96       | 52       | 22       | 19       |
| 51         | 151      | 225      | 120      | 223      | 144      | 103      | 52       | 24       | 20       |
| 54         | 152      | 236      | 120      | 239      | 147      | 104      | 53       | 25       | 21       |
| 57         | 153      | 250      | 122      | 241      | 156      | 112      | 54       | 26       | 22       |
| 60         | 159      | 260      | 124      | 242      | 156      | 112      | 54       | 27       | 22       |
| 63         | 171      | 260      | 129      | 243      | 157      | 115      | 58       | 27       | 22       |
| 66         | 180      | 264      | 133      | 251      | 169      | 115      | 59       | 29       | 23       |
| 69         | 188      | 264      | 136      | 260      | 170      | 115      | 60       | 29       | 23       |
| 72         | 190      | 276      | 137      | 261      | 178      | 117      | 61       | 29       | 24       |
| 75         | 190      | 278      | 144      | 261      | 179      | 120      | 62       | 29       | 25       |
| 78         | 192      | 279      | 144      | 262      | 184      | 122      | 62       | 31       | 27       |
| 81         | 193      | 280      | 145      | 279      | 186      | 124      | 62       | 31       | 31       |
| 84         | 198      | 287      | 146      | 289      | 189      | 126      | 62       | 32       | 31       |
| 87         | 201      | 290      | 150      | 295      | 192      | 129      | 65       | 32       | 31       |
| 90         | 204      | 293      | 151      | 305      | 194      | 130      | 65       | 33       | 31       |
| 93         | 205      | 293      | 151      | 307      | 198      | 131      | 66       | 33       | 33       |
| 96         | 206      | 300      | 154      | 309      | 200      | 134      | 68       | 34       | 33       |
| 99         | 206      | 305      | 156      | 317      | 207      | 135      | 71       | 35       | 34       |
| 102        | 213      | 320      | 158      | 326      | 213      | 138      | 71       | 36       | 34       |
| 105        | 214      | 328      | 160      | 327      | 214      | 140      | 71       | 36       | 34       |
| 108        | 216      | 328      | 164      | 328      | 216      | 143      | 72       | 36       | 34       |
| 111        | 216      | 329      | 177      | 331      | 221      | 146      | 73       | 37       | 35       |
| 114        | 224      | 337      | 178      | 336      | 223      | 148      | 73       | 37       | 35       |

|     |     |     |     |     |     |     |     |    |    |
|-----|-----|-----|-----|-----|-----|-----|-----|----|----|
| 117 | 225 | 347 | 183 | 337 | 226 | 150 | 74  | 38 | 36 |
| 120 | 229 | 350 | 184 | 344 | 229 | 151 | 75  | 38 | 36 |
| 123 | 229 | 354 | 185 | 347 | 230 | 152 | 76  | 39 | 37 |
| 126 | 236 | 363 | 186 | 353 | 231 | 154 | 83  | 39 | 37 |
| 129 | 239 | 364 | 189 | 364 | 237 | 154 | 83  | 40 | 38 |
| 132 | 243 | 364 | 199 | 371 | 239 | 155 | 84  | 40 | 38 |
| 135 | 243 | 366 | 204 | 374 | 243 | 156 | 84  | 41 | 38 |
| 138 | 244 | 371 | 204 | 378 | 245 | 158 | 85  | 43 | 38 |
| 141 | 244 | 375 | 210 | 380 | 246 | 160 | 86  | 44 | 38 |
| 144 | 248 | 376 | 210 | 389 | 247 | 163 | 89  | 44 | 38 |
| 147 | 252 | 376 | 211 | 404 | 248 | 163 | 89  | 45 | 39 |
| 150 | 254 | 380 | 214 | 406 | 249 | 163 | 91  | 45 | 39 |
| 153 | 255 | 389 | 215 | 411 | 251 | 171 | 91  | 46 | 40 |
| 156 | 256 | 392 | 220 | 415 | 251 | 172 | 92  | 47 | 40 |
| 159 | 259 | 394 | 225 | 419 | 259 | 177 | 93  | 48 | 41 |
| 162 | 260 | 398 | 227 | 434 | 261 | 180 | 96  | 48 | 43 |
| 165 | 261 | 408 | 227 | 436 | 262 | 183 | 97  | 48 | 43 |
| 168 | 267 | 412 | 227 | 439 | 264 | 184 | 97  | 48 | 45 |
| 171 | 273 | 415 | 227 | 442 | 273 | 185 | 101 | 51 | 45 |
| 174 | 287 | 425 | 232 | 442 | 277 | 188 | 102 | 57 | 47 |
| 177 | 291 | 433 | 234 | 493 | 277 | 191 | 114 | 60 | 48 |
| 180 | 315 | 458 | 237 | 494 | 289 | 197 | 124 | 61 | 48 |

Table S9 The swelling percentage of the PPG sample 1 in saline solutions.

| Time (min) | CaCl <sub>2</sub> ·2H <sub>2</sub> O | BaCl <sub>2</sub> ·2H <sub>2</sub> O | MgCl <sub>2</sub> ·6H <sub>2</sub> O | LiCl | NaCl | KCl |
|------------|--------------------------------------|--------------------------------------|--------------------------------------|------|------|-----|
| 3          | 62                                   | 88                                   | 59                                   | 60   | 61   | 35  |
| 6          | 100                                  | 88                                   | 79                                   | 67   | 64   | 59  |
| 9          | 124                                  | 108                                  | 101                                  | 80   | 74   | 69  |
| 12         | 138                                  | 130                                  | 111                                  | 85   | 82   | 85  |
| 15         | 159                                  | 141                                  | 123                                  | 91   | 96   | 99  |
| 18         | 191                                  | 151                                  | 130                                  | 96   | 108  | 109 |
| 21         | 200                                  | 157                                  | 148                                  | 99   | 110  | 113 |
| 24         | 205                                  | 183                                  | 149                                  | 117  | 110  | 126 |
| 27         | 209                                  | 192                                  | 161                                  | 128  | 116  | 130 |
| 30         | 227                                  | 201                                  | 185                                  | 135  | 125  | 138 |
| 33         | 254                                  | 204                                  | 186                                  | 155  | 128  | 149 |
| 36         | 258                                  | 221                                  | 187                                  | 162  | 136  | 159 |
| 39         | 270                                  | 230                                  | 207                                  | 163  | 144  | 160 |
| 42         | 276                                  | 247                                  | 208                                  | 166  | 153  | 178 |
| 45         | 279                                  | 255                                  | 220                                  | 170  | 158  | 187 |
| 48         | 290                                  | 269                                  | 221                                  | 172  | 161  | 191 |
| 51         | 294                                  | 280                                  | 233                                  | 175  | 170  | 192 |
| 54         | 303                                  | 281                                  | 234                                  | 185  | 176  | 196 |
| 57         | 307                                  | 283                                  | 251                                  | 188  | 182  | 198 |
| 60         | 309                                  | 297                                  | 258                                  | 202  | 190  | 209 |
| 63         | 312                                  | 317                                  | 262                                  | 202  | 193  | 213 |
| 66         | 315                                  | 321                                  | 263                                  | 215  | 199  | 220 |
| 69         | 334                                  | 331                                  | 273                                  | 216  | 200  | 226 |
| 72         | 344                                  | 341                                  | 290                                  | 221  | 216  | 237 |
| 75         | 345                                  | 343                                  | 297                                  | 225  | 219  | 240 |
| 78         | 372                                  | 345                                  | 302                                  | 225  | 221  | 241 |
| 81         | 375                                  | 348                                  | 304                                  | 227  | 228  | 253 |
| 84         | 376                                  | 359                                  | 311                                  | 228  | 231  | 256 |
| 87         | 384                                  | 373                                  | 313                                  | 238  | 236  | 256 |
| 90         | 393                                  | 382                                  | 318                                  | 242  | 236  | 258 |
| 93         | 402                                  | 384                                  | 319                                  | 243  | 252  | 260 |
| 96         | 417                                  | 387                                  | 324                                  | 245  | 253  | 272 |
| 99         | 423                                  | 399                                  | 333                                  | 250  | 257  | 273 |
| 102        | 423                                  | 406                                  | 339                                  | 263  | 274  | 279 |
| 105        | 427                                  | 406                                  | 349                                  | 267  | 278  | 283 |
| 108        | 427                                  | 411                                  | 351                                  | 269  | 280  | 291 |
| 111        | 436                                  | 416                                  | 353                                  | 277  | 280  | 293 |
| 114        | 451                                  | 416                                  | 355                                  | 278  | 281  | 301 |

|     |     |     |     |     |     |     |
|-----|-----|-----|-----|-----|-----|-----|
| 117 | 457 | 421 | 359 | 279 | 282 | 308 |
| 120 | 469 | 431 | 362 | 280 | 285 | 311 |
| 123 | 471 | 439 | 374 | 281 | 290 | 313 |
| 126 | 483 | 459 | 374 | 292 | 292 | 314 |
| 129 | 485 | 463 | 377 | 299 | 297 | 315 |
| 132 | 496 | 463 | 383 | 300 | 298 | 320 |
| 135 | 497 | 466 | 393 | 301 | 306 | 324 |
| 138 | 501 | 470 | 402 | 311 | 307 | 333 |
| 141 | 507 | 471 | 402 | 313 | 316 | 333 |
| 144 | 513 | 474 | 406 | 314 | 322 | 337 |
| 147 | 514 | 477 | 414 | 316 | 327 | 345 |
| 150 | 530 | 487 | 418 | 319 | 330 | 346 |
| 153 | 537 | 491 | 420 | 321 | 343 | 349 |
| 156 | 542 | 495 | 421 | 324 | 343 | 358 |
| 159 | 542 | 500 | 425 | 335 | 345 | 360 |
| 162 | 544 | 504 | 427 | 336 | 346 | 364 |
| 165 | 549 | 507 | 436 | 342 | 348 | 365 |
| 168 | 561 | 520 | 438 | 343 | 353 | 371 |
| 171 | 561 | 524 | 441 | 357 | 356 | 374 |
| 174 | 563 | 531 | 453 | 359 | 357 | 380 |
| 177 | 567 | 535 | 458 | 368 | 362 | 381 |
| 180 | 576 | 544 | 461 | 369 | 363 | 382 |

Table S10 The swelling percentage of the PPG sample 4 in saline solutions.

| Time (min) | CaCl <sub>2</sub> ·2H <sub>2</sub> O | BaCl <sub>2</sub> ·2H <sub>2</sub> O | MgCl <sub>2</sub> ·6H <sub>2</sub> O | LiCl | NaCl | KCl |
|------------|--------------------------------------|--------------------------------------|--------------------------------------|------|------|-----|
| 3          | 14                                   | 84                                   | 35                                   | 72   | 41   | 84  |
| 6          | 30                                   | 85                                   | 67                                   | 76   | 42   | 96  |
| 9          | 63                                   | 118                                  | 94                                   | 85   | 47   | 98  |
| 12         | 86                                   | 128                                  | 119                                  | 91   | 51   | 109 |
| 15         | 105                                  | 133                                  | 120                                  | 123  | 70   | 115 |
| 18         | 110                                  | 151                                  | 145                                  | 133  | 76   | 125 |
| 21         | 118                                  | 157                                  | 153                                  | 140  | 79   | 131 |
| 24         | 140                                  | 169                                  | 173                                  | 156  | 87   | 136 |
| 27         | 142                                  | 172                                  | 180                                  | 158  | 88   | 141 |
| 30         | 151                                  | 191                                  | 183                                  | 162  | 106  | 146 |
| 33         | 160                                  | 206                                  | 205                                  | 165  | 116  | 160 |
| 36         | 167                                  | 207                                  | 215                                  | 181  | 128  | 171 |
| 39         | 179                                  | 237                                  | 216                                  | 182  | 134  | 182 |
| 42         | 189                                  | 241                                  | 216                                  | 186  | 136  | 185 |
| 45         | 199                                  | 254                                  | 239                                  | 186  | 136  | 189 |
| 48         | 204                                  | 265                                  | 242                                  | 203  | 139  | 192 |
| 51         | 207                                  | 267                                  | 256                                  | 223  | 153  | 213 |
| 54         | 207                                  | 275                                  | 259                                  | 239  | 155  | 241 |
| 57         | 218                                  | 284                                  | 260                                  | 241  | 155  | 244 |
| 60         | 232                                  | 317                                  | 276                                  | 242  | 160  | 248 |
| 63         | 237                                  | 322                                  | 286                                  | 243  | 168  | 250 |
| 66         | 238                                  | 323                                  | 290                                  | 251  | 171  | 255 |
| 69         | 241                                  | 324                                  | 294                                  | 260  | 172  | 258 |
| 72         | 250                                  | 341                                  | 313                                  | 261  | 175  | 265 |
| 75         | 254                                  | 343                                  | 315                                  | 261  | 185  | 269 |
| 78         | 259                                  | 351                                  | 330                                  | 262  | 191  | 271 |
| 81         | 260                                  | 359                                  | 334                                  | 279  | 197  | 276 |
| 84         | 265                                  | 366                                  | 346                                  | 289  | 206  | 290 |
| 87         | 276                                  | 372                                  | 352                                  | 295  | 214  | 294 |
| 90         | 291                                  | 384                                  | 360                                  | 305  | 214  | 303 |
| 93         | 293                                  | 385                                  | 360                                  | 307  | 225  | 304 |
| 96         | 298                                  | 395                                  | 368                                  | 309  | 229  | 304 |
| 99         | 300                                  | 398                                  | 378                                  | 317  | 231  | 307 |
| 102        | 301                                  | 401                                  | 383                                  | 326  | 231  | 312 |
| 105        | 303                                  | 412                                  | 401                                  | 327  | 237  | 319 |
| 108        | 306                                  | 435                                  | 406                                  | 328  | 238  | 320 |
| 111        | 315                                  | 436                                  | 416                                  | 331  | 241  | 321 |
| 114        | 322                                  | 461                                  | 416                                  | 336  | 242  | 324 |

|     |     |     |     |     |     |     |
|-----|-----|-----|-----|-----|-----|-----|
| 117 | 338 | 462 | 427 | 337 | 246 | 328 |
| 120 | 343 | 463 | 432 | 344 | 250 | 328 |
| 123 | 347 | 466 | 433 | 347 | 254 | 336 |
| 126 | 352 | 480 | 436 | 353 | 254 | 337 |
| 129 | 363 | 497 | 452 | 364 | 255 | 342 |
| 132 | 365 | 498 | 462 | 371 | 259 | 352 |
| 135 | 368 | 508 | 464 | 374 | 260 | 358 |
| 138 | 370 | 510 | 465 | 378 | 262 | 367 |
| 141 | 370 | 518 | 468 | 380 | 265 | 367 |
| 144 | 375 | 518 | 473 | 389 | 274 | 373 |
| 147 | 390 | 518 | 477 | 404 | 276 | 374 |
| 150 | 403 | 524 | 484 | 406 | 276 | 375 |
| 153 | 403 | 527 | 488 | 411 | 278 | 378 |
| 156 | 405 | 530 | 493 | 415 | 284 | 387 |
| 159 | 410 | 533 | 494 | 419 | 286 | 391 |
| 162 | 410 | 537 | 496 | 434 | 289 | 395 |
| 165 | 414 | 539 | 498 | 436 | 291 | 397 |
| 168 | 414 | 577 | 500 | 439 | 294 | 397 |
| 171 | 419 | 580 | 503 | 442 | 298 | 398 |
| 174 | 420 | 587 | 509 | 442 | 299 | 398 |
| 177 | 424 | 603 | 519 | 493 | 309 | 401 |
| 180 | 429 | 637 | 526 | 494 | 311 | 422 |

**Table S11** The swelling percentage of the PPG sample 1 in acidic and alkaline media of  $\text{CaCl}_2 \cdot 2\text{H}_2\text{O}$  saline solution.

| <b>Time (min)</b> | <b>NaOH</b> | <b>HCl</b> |
|-------------------|-------------|------------|
| 3                 | 62          | 249        |
| 6                 | 88          | 260        |
| 9                 | 109         | 271        |
| 12                | 119         | 280        |
| 15                | 138         | 282        |
| 18                | 148         | 310        |
| 21                | 168         | 324        |
| 24                | 196         | 339        |
| 27                | 207         | 343        |
| 30                | 219         | 350        |
| 33                | 376         | 508        |
| 36                | 382         | 511        |
| 39                | 404         | 517        |
| 42                | 414         | 533        |
| 45                | 421         | 535        |
| 48                | 439         | 555        |
| 51                | 456         | 558        |
| 54                | 463         | 558        |
| 57                | 466         | 565        |
| 60                | 471         | 567        |
| 63                | 587         | 653        |
| 66                | 589         | 660        |
| 69                | 590         | 669        |
| 72                | 605         | 673        |
| 75                | 610         | 682        |
| 78                | 619         | 686        |
| 81                | 641         | 704        |
| 84                | 646         | 709        |
| 87                | 652         | 712        |
| 90                | 659         | 721        |

**Table S12** The swelling percentage of the PPG sample 1 in acidic and alkaline media of  $\text{MgCl}_2 \cdot 6\text{H}_2\text{O}$  saline solution.

| <b>Time (min)</b> | <b>NaOH</b> | <b>HCl</b> |
|-------------------|-------------|------------|
| 3                 | 73          | 241        |
| 6                 | 90          | 253        |
| 9                 | 113         | 259        |
| 12                | 127         | 266        |
| 15                | 144         | 277        |
| 18                | 159         | 285        |
| 21                | 173         | 301        |
| 24                | 185         | 304        |
| 27                | 195         | 315        |
| 30                | 200         | 332        |
| 33                | 348         | 449        |
| 36                | 350         | 460        |
| 39                | 375         | 467        |
| 42                | 381         | 483        |
| 45                | 393         | 485        |
| 48                | 411         | 487        |
| 51                | 420         | 498        |
| 54                | 431         | 499        |
| 57                | 431         | 520        |
| 60                | 432         | 526        |
| 63                | 524         | 588        |
| 66                | 544         | 592        |
| 69                | 546         | 612        |
| 72                | 551         | 613        |
| 75                | 551         | 614        |
| 78                | 554         | 616        |
| 81                | 564         | 626        |
| 84                | 571         | 632        |
| 87                | 576         | 639        |
| 90                | 578         | 648        |



Table S13 pH Changes of the CaCl<sub>2</sub>·2H<sub>2</sub>O salt solution versus time.

| Time (min) | pH (NaOH) | pH (HCl) |
|------------|-----------|----------|
| 3          | 9         | 2.78     |
| 6          | 8         | 2.8      |
| 9          | 8         | 2.83     |
| 12         | 8         | 2.87     |
| 15         | 8         | 2.9      |
| 18         | 8         | 2.95     |
| 21         | 8         | 3.01     |
| 24         | 8         | 3.09     |
| 27         | 8         | 3.17     |
| 30         | 7         | 3.21     |
| 33         | 6         | 3.67     |
| 36         | 6         | 3.53     |
| 39         | 6         | 3.49     |
| 42         | 6         | 3.49     |
| 45         | 6         | 3.5      |
| 48         | 6         | 3.5      |
| 51         | 6         | 3.5      |
| 54         | 6         | 3.51     |
| 57         | 6         | 3.51     |
| 60         | 6         | 3.51     |
| 63         | 5         | 3.59     |
| 66         | 5         | 3.59     |
| 69         | 5         | 3.59     |
| 72         | 5         | 3.59     |
| 75         | 5         | 3.59     |
| 78         | 5         | 3.59     |
| 81         | 5         | 3.59     |
| 84         | 4         | 3.6      |
| 87         | 4         | 3.6      |
| 90         | 4         | 3.65     |

Table S14 pH Changes of the MgCl<sub>2</sub>.6H<sub>2</sub>O salt solution versus time.

| Time (min) | pH (NaOH) | pH (HCl) |
|------------|-----------|----------|
| 3          | 8.22      | 3.13     |
| 6          | 8.18      | 3.14     |
| 9          | 8.18      | 3.14     |
| 12         | 8.12      | 3.15     |
| 15         | 8.1       | 3.15     |
| 18         | 8.05      | 3.15     |
| 21         | 7.99      | 3.16     |
| 24         | 7.93      | 3.16     |
| 27         | 7.85      | 3.16     |
| 30         | 7.78      | 3.16     |
| 33         | 6.75      | 3.27     |
| 36         | 6.68      | 3.31     |
| 39         | 6.6       | 3.35     |
| 42         | 6.49      | 3.37     |
| 45         | 6.45      | 3.4      |
| 48         | 6.35      | 3.4      |
| 51         | 6.22      | 3.41     |
| 54         | 6.08      | 3.42     |
| 57         | 6         | 3.42     |
| 60         | 5.9       | 3.42     |
| 63         | 5.3       | 3.45     |
| 66         | 5.29      | 3.45     |
| 69         | 5.25      | 3.45     |
| 72         | 5.16      | 3.45     |
| 75         | 5.14      | 3.46     |
| 78         | 5.08      | 3.47     |
| 81         | 4.98      | 3.48     |
| 84         | 4.92      | 3.48     |
| 87         | 4.85      | 3.48     |
| 90         | 4.67      | 3.48     |
